# Supplementary material for: Monitoring of clinical strains and environmental fungal aerocontamination to prevent invasive aspergillosis infections in hospital during large deconstruction work: a protocol study
Source: PubMed Central journal article supplement — BMJ Open. 2017 Nov 25;7(11):e018109. doi: 10.1136/bmjopen-2017-018109 (PMC5719317; doi:10.1136/bmjopen-2017-018109), 2017-11-25
Supplement: bmjopen-2017-018109.draft_revisions.pdf [file bmjopen-2017-018109.draft_revisions.pdf]

# BMJ Open

BMJ Open is committed to open peer review. As part of this commitment we make the peer review history of every article we publish publicly available.

When an article is published we post the peer reviewers' comments and the authors' responses online. We also post the versions of the paper that were used during peer review. These are the versions that the peer review comments apply to.

The versions of the paper that follow are the versions that were submitted during the peer review process. They are not the versions of record or the final published versions. They should not be cited or distributed as the published version of this manuscript.

BMJ Open is an open access journal and the full, final, typeset and author-corrected version of record of the manuscript is available on our site with no access controls, subscription charges or pay-per-view fees (<http://bmjopen.bmj.com>).

If you have any questions on BMJ Open's open peer review process please email [editorial.bmjopen@bmj.com](mailto:editorial.bmjopen@bmj.com)

# BMJ Open

## Monitoring of clinical strains and environmental fungal aerocontamination to prevent invasive Aspergillosis infections in hospital during large deconstruction work: a protocol study

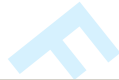

|                                 |                                                                                                                                                                                                                                                                                                                                                                                                                                                                                                                                                                                                                                                                                                                                                                                                                                                                                                                                                                                                                                                                                                                                                                                                                                                                                                                                                                                                                                                                                                                                                                                                                                                                                                                                                                                                                                                                                                                                                                                                                                                                                                                                                                                                                                                                                                                                                                                                                                                            |
|---------------------------------|------------------------------------------------------------------------------------------------------------------------------------------------------------------------------------------------------------------------------------------------------------------------------------------------------------------------------------------------------------------------------------------------------------------------------------------------------------------------------------------------------------------------------------------------------------------------------------------------------------------------------------------------------------------------------------------------------------------------------------------------------------------------------------------------------------------------------------------------------------------------------------------------------------------------------------------------------------------------------------------------------------------------------------------------------------------------------------------------------------------------------------------------------------------------------------------------------------------------------------------------------------------------------------------------------------------------------------------------------------------------------------------------------------------------------------------------------------------------------------------------------------------------------------------------------------------------------------------------------------------------------------------------------------------------------------------------------------------------------------------------------------------------------------------------------------------------------------------------------------------------------------------------------------------------------------------------------------------------------------------------------------------------------------------------------------------------------------------------------------------------------------------------------------------------------------------------------------------------------------------------------------------------------------------------------------------------------------------------------------------------------------------------------------------------------------------------------------|
| Journal:                        | <i>BMJ Open</i>                                                                                                                                                                                                                                                                                                                                                                                                                                                                                                                                                                                                                                                                                                                                                                                                                                                                                                                                                                                                                                                                                                                                                                                                                                                                                                                                                                                                                                                                                                                                                                                                                                                                                                                                                                                                                                                                                                                                                                                                                                                                                                                                                                                                                                                                                                                                                                                                                                            |
| Manuscript ID                   | bmjopen-2017-018109                                                                                                                                                                                                                                                                                                                                                                                                                                                                                                                                                                                                                                                                                                                                                                                                                                                                                                                                                                                                                                                                                                                                                                                                                                                                                                                                                                                                                                                                                                                                                                                                                                                                                                                                                                                                                                                                                                                                                                                                                                                                                                                                                                                                                                                                                                                                                                                                                                        |
| Article Type:                   | Protocol                                                                                                                                                                                                                                                                                                                                                                                                                                                                                                                                                                                                                                                                                                                                                                                                                                                                                                                                                                                                                                                                                                                                                                                                                                                                                                                                                                                                                                                                                                                                                                                                                                                                                                                                                                                                                                                                                                                                                                                                                                                                                                                                                                                                                                                                                                                                                                                                                                                   |
| Date Submitted by the Author:   | 06-Jun-2017                                                                                                                                                                                                                                                                                                                                                                                                                                                                                                                                                                                                                                                                                                                                                                                                                                                                                                                                                                                                                                                                                                                                                                                                                                                                                                                                                                                                                                                                                                                                                                                                                                                                                                                                                                                                                                                                                                                                                                                                                                                                                                                                                                                                                                                                                                                                                                                                                                                |
| Complete List of Authors:       | <p>Loeffert, Sophie; Fondation Mérieux, Centre International de Recherche en Infectiologie (CIRI), Inserm U1111, CNRS UMR5308, ENS de Lyon, France, Université de Lyon 1., Laboratoire des Pathogènes Emergents-Fondation Mérieux</p> <p>Melloul, Elise; EnvA, UPEC, Université Paris Est, EA 7380 Dynamyc</p> <p>Dananché, Cédric; Hospices Civils de Lyon, Unité d'hygiène, épidémiologie et prévention; Fondation Mérieux, Centre International de Recherche en Infectiologie (CIRI), Inserm U1111, CNRS UMR5308, ENS de Lyon, France, Université de Lyon 1., Laboratoire des Pathogènes Emergents</p> <p>Hénaff, Laetitia; Fondation Mérieux, Centre International de Recherche en Infectiologie (CIRI), Inserm U1111, CNRS UMR5308, ENS de Lyon, France, Université de Lyon 1., Laboratoire des Pathogènes Emergents</p> <p>Bénet, Thomas; Groupement Hospitalier Centre, Hospices Civils de Lyon, France., Unité d'hygiène, épidémiologie et prévention; Fondation Mérieux, Centre International de Recherche en Infectiologie (CIRI), Inserm U1111, CNRS UMR5308, ENS de Lyon, France, Université de Lyon 1., Laboratoire des Pathogènes Emergents</p> <p>Cassier, Pierre; Groupement Hospitalier Centre, Hospices Civils de Lyon, France., Laboratoire de Biologie Sécurité Environnement</p> <p>Dupont, Damien; Hôpital de la Croix Rousse, Hospices Civils de Lyon, Institut de Parasitologie et de Mycologie Médical</p> <p>Guillot, Jacques; EnvA, UPEC, Université Paris Est, EA 7380 Dynamyc</p> <p>Botterel, Françoise; EnvA, UPEC, Université Paris Est, EA 7380 Dynamyc</p> <p>Wallon, Martine; Hôpital de la Croix Rousse, Hospices Civils de Lyon, Institut de Parasitologie et de Mycologie Médical</p> <p>Gustin, Marie-Paule; Fondation Mérieux, Centre International de Recherche en Infectiologie (CIRI), Inserm U1111, CNRS UMR5308, ENS de Lyon, France, Université de Lyon 1, Laboratoire des Pathogènes Emergents; Institut des Sciences Pharmaceutiques et Biologiques (ISPB)-Faculté de Pharmacie, Université Claude Bernard Lyon 1, Département de santé publique</p> <p>Vanhems, Philippe; Fondation Mérieux, Centre International de Recherche en Infectiologie (CIRI), Inserm U1111, CNRS UMR5308, ENS de Lyon, France, Université de Lyon 1., Laboratoire des Pathogènes Emergents-Fondation Mérieux; Groupement Hospitalier Centre, Hospices Civils de Lyon, France., Unité d'hygiène, épidémiologie et prévention</p> |
| <b>Primary Subject Heading</b>: | Public health                                                                                                                                                                                                                                                                                                                                                                                                                                                                                                                                                                                                                                                                                                                                                                                                                                                                                                                                                                                                                                                                                                                                                                                                                                                                                                                                                                                                                                                                                                                                                                                                                                                                                                                                                                                                                                                                                                                                                                                                                                                                                                                                                                                                                                                                                                                                                                                                                                              |

1  
2  
3  
4  
5  
6  
7  
8  
9  
10  
11  
12  
13  
14  
15  
16  
17  
18  
19  
20  
21  
22  
23  
24  
25  
26  
27  
28  
29  
30  
31  
32  
33  
34  
35  
36  
37  
38  
39  
40  
41  
42  
43  
44  
45  
46  
47  
48  
49  
50  
51  
52  
53  
54  
55  
56  
57  
58  
59  
60

|                            |                                                                                                                                  |
|----------------------------|----------------------------------------------------------------------------------------------------------------------------------|
| Secondary Subject Heading: | Infectious diseases, Research methods                                                                                            |
| Keywords:                  | Invasive aspergillosis, Clinical monitoring, Environmental monitoring, Aspergillus fumigatus, Azole resistance, Genetic patterns |
|                            |                                                                                                                                  |

SCHOLARONE™  
Manuscripts

For peer review only

1  
2  
3 **Monitoring of clinical strains and environmental fungal aerocontamination to prevent**  
4 **invasive Aspergillus infections in hospital during large deconstruction work: a protocol**  
5 **study**  
6  
7

8 **Sophie Tiphaine Loeffert<sup>1</sup>, Elise Melloul<sup>2</sup>, Cédric Dananché<sup>1,3</sup>, Laetitia Hénaff<sup>1</sup>, Thomas**  
9 **Bénet<sup>1,3</sup>, Pierre Cassier<sup>4</sup>, Damien Dupont<sup>5</sup>, Jacques Guillot<sup>2</sup>, Françoise Botterel<sup>2</sup>,**  
10 **Martine Wallon<sup>5</sup>, Marie-Paule Gustin<sup>1,6</sup>, Philippe Vanhems<sup>1,3</sup>**  
11

12  
13  
14 Corresponding author: Sophie T. Loeffert, Emergent Pathogens Laboratory – Fondation  
15 Mérieux, Centre International de Recherche en Infectiologie, INSERM U1111, CNRS  
16 UMR5308, ENS de Lyon, Université Claude Bernard, 21, avenue Tony Garnier, Lyon 69007,  
17 France. Email: [sophie.loeffert01@chu-lyon.fr](mailto:sophie.loeffert01@chu-lyon.fr). Telephone: +33.(0)4.72.11.07.20  
18

19  
20  
21 <sup>1</sup>Laboratoire des Pathogènes Emergents-Fondation Mérieux, Centre International de Recherche en  
22 Infectiologie (CIRI), Inserm U1111, CNRS UMR5308, ENS de Lyon, France, Université de Lyon 1.  
23

24  
25 <sup>2</sup>EA 7380 Dynamyc, EnvA, UPEC, Université Paris Est, Créteil, France  
26

27 <sup>3</sup>Unité d'hygiène, épidémiologie et prévention, Groupement Hospitalier Centre, Hospices Civils de  
28 Lyon, France.  
29

30 <sup>4</sup>Laboratoire de Biologie Sécurité Environnement, Groupement Hospitalier Centre, Hospices  
31 Civils de Lyon, France.  
32

33 <sup>5</sup>Institut de Parasitologie et de Mycologie Médical, Hôpital de la Croix Rousse, Lyon, France.  
34

35  
36 <sup>6</sup>Département de santé publique, Institut des Sciences Pharmaceutiques et Biologiques  
37 (ISPB)-Faculté de Pharmacie, Université Claude Bernard Lyon 1, France.  
38

39  
40 **Word count:**

- 41  
42 ➤ Abstract: 232 words  
43  
44 ➤ Text body: 3012 words  
45  
46  
47

48 **Keywords:**

49  
50 Invasive aspergillosis  
51 Clinical monitoring  
52 Environmental monitoring  
53 Azole resistance  
54 *Aspergillus fumigatus*  
55 Genetic patterns  
56  
57

**ABSTRACT**

Introduction: Monitoring fungal aerocontamination is an essential measure to prevent severe invasive aspergillosis (IA) infections in hospitals. One central block among 32 blocks of Edouard Herriot Hospital was entirely demolished in 2015, while care activities continued in surrounding blocks. The main objective was to undertake broad environmental monitoring and clinical surveillance of IA cases to document fungal dispersion during major deconstruction work and to assess clinical risk.

Methods and analysis: A daily environmental survey of fungal loads was conducted in 8 wards located near the demolition site. Air was collected inside and outside selected wards by agar impact samplers. Daily spore concentrations were monitored continuously by volumetric samplers at a flow rate of 10 L.min<sup>-1</sup>. Daily temperature, wind direction and speed as well as relative humidity were recorded by the French meteorological station Meteociel. *Aspergillus fumigatus* strains stored will be genotyped by multiple-locus, variable-number, tandem-repeat analysis. Antifungal susceptibility will be assessed by E-test<sup>®</sup> strips on Roswell Park Memorial Institute medium supplemented with agar. Ascertaining the adequacy of current environmental monitoring techniques in hospital is of growing importance, considering the rising impact of fungal infections and of curative antifungal costs. The present study could improve the daily management of IA risk during major deconstruction work and generate new data to ameliorate and redefine current guidelines.

Ethics and dissemination: This study was approved by the clinical research and ethics committees of Edouard Herriot Hospital.

### Strengths and limitations of this study

- This study is one of the largest ongoing prospective studies to evaluate combined approach of environmental and clinical monitoring in hospital during major deconstruction works.
- The high frequency and number of samples collected in this study during deconstruction works will allow powerful statistical analysis to evaluate the efficiency of protective measures and reduce fungal contamination.
- Non-cultivable methods monitoring outdoor *Aspergillus* aerocontamination for hospital alerts are evaluated.
- Genetic diversity and their antifungal susceptibility profiles of clinical and environmental collected isolates are determined to give complete information on *Aspergillus spp.* dispersion and hopefully give new insights into improvement of environmental monitoring and of hospital guidelines during major demolition work.
- Microbiological identification will focus only on *Aspergillus spp.* because it is the leading pathogen responsible for IA. Although 2 air sampling collectors were used in the study, no particle counter was tested.

### INTRODUCTION

Invasive fungal infections are major threats to immunocompromised patients because of their high incidence and related mortality.<sup>1</sup> They occur through inhalation of airborne conidia with various consequences, such as immune-allergic reactions to invasive aspergillosis (IA), a severe opportunistic disease caused mostly by *Aspergillus fumigatus* (>80%) and, to a lesser extent, by *A. flavus*, *A. niger*, *A. terreus*, and *A. nidulans*.<sup>2,3</sup> IA is a very serious condition, with crude lethality ranging from 50 to 90% and greater mortality in

1  
2  
3 hematological patients.<sup>4-6</sup> Its epidemiology has changed in recent years, surfacing in non-  
4  
5 hematological units, such as intensive care units (ICUs), and increasing in non-neutropenic  
6  
7 hosts treated with corticosteroids or life-long immunosuppressants.<sup>6,7</sup> The burden of patients  
8  
9 at risk of IA is growing every year because of longer survival and improved care.<sup>8</sup> Azole  
10  
11 antifungals are commonly given to combat IA in many countries, with recent studies reporting  
12  
13 an emerging, worldwide problem: azole drug resistance of *A. fumigatus* isolates.<sup>9-14</sup>  
14  
15

16  
17 *Aspergillus* species are opportunistic pathogens widely distributed in the environment  
18  
19 and easily transported by air because of their conidia size.<sup>14</sup> Construction work in healthcare  
20  
21 settings in past decades has been associated with major IA outbreaks.<sup>4</sup> Construction involving  
22  
23 periods of renovation or deconstruction increases spore release, creating high-risk situations  
24  
25 in hospitals.<sup>1,15,16</sup> In the 1980s, 22 IA cases arose over a 30-month period during building  
26  
27 renovations at Edouard Herriot Hospital (EHH) (Lyon, France).<sup>17</sup> A quasi-experimental study,  
28  
29 conducted in an adult hematology unit of this hospital, underlined the need for monitoring  
30  
31 environmental factors to prevent nosocomial IA.<sup>18</sup> A sampling strategy for fungal monitoring  
32  
33 in hospital was based on study results.<sup>15,19</sup>  
34  
35  
36

37  
38 Recently, an entire block in EHH underwent deconstruction without suspension of  
39  
40 care activities in direct proximity to it. The situation prompted the infection control team to  
41  
42 monitor fungal dispersion and look for cases of *Aspergillus* disease. Only a few studies have  
43  
44 been performed in this context and under similar conditions so that sampling strategies and  
45  
46 analyses differ, indicating varying fungal loads.<sup>16-22</sup> All these investigations have highlighted  
47  
48 the common need for innovative approaches and tools to improve research in the field.<sup>19</sup> Real-  
49  
50 time methods may provide warning systems by monitoring outdoor fungal loads.<sup>22</sup>  
51  
52  
53  
54  
55  
56  
57  
58  
59  
60

1  
2  
3 The purpose of the present work was to carry out broad environmental monitoring and  
4 clinical surveillance of IA cases to better understand fungal dispersion during major  
5 deconstruction work.  
6  
7  
8  
9

## 10 11 12 13 **METHODS**

### 14 **Study objectives**

15  
16  
17 The objective of this study is to provide new data for future guidelines on adequate  
18 management of invasive fungal infection risk in hospital during major deconstruction work.  
19  
20 Its intermediate objectives are to: 1) evaluate non-cultivable methods monitoring outdoor  
21 *Aspergillus* aerocontamination for hospital alerts, 2) assess the impact of meteorological  
22 parameters (MP) on *Aspergillus* aerocontamination, and 3) compare the genetic diversity of  
23 clinical and environmental *A. fumigatus* isolates and ascertain their antifungal susceptibility  
24 profiles.  
25  
26  
27  
28  
29  
30  
31  
32

### 33 **Study site**

34  
35 Built in the 1930s in Lyon, Rhône-Alpes, France, on a 15.5-hectare site, EHH is a  
36 university-affiliated hospital composed of 32 independent blocks divided by tree-planted  
37 walkways and grassy areas. This 850-adult bed tertiary institution provides care to a large  
38 panel of immunocompromised patients (solid organ transplantation, hematopoietic stem cell  
39 transplantation, immunosuppressive treatment, ICU: intensive care unit). The central block  
40 that was demolished measured 0.6 hectares, representing approximately 12.2% of the area  
41 covered by hospital blocks (Figure 1). Three deconstruction periods at EHH were scheduled  
42 between February and December 2015. The first period, between February and June 2015,  
43 consisted of gutting the building and removing asbestos from it. The floors were removed in  
44 July and August 2015. Excavation and earthwork took place between September and  
45  
46  
47  
48  
49  
50  
51  
52  
53  
54  
55  
56  
57  
58  
59  
60



1  
2  
3 December 2015. Finally, concrete was poured at the end of December 2015 to allow  
4  
5 construction of the new building comprising fully-equipped areas (operating rooms, ICUs and  
6  
7 heliport) on 2.5 hectares.

### 8 9 **Study design**

10  
11 The study was conducted in 8 medical wards located around the demolition site: 4  
12  
13 ICUs, 1 kidney and pancreas transplantation unit, and 3 medical wards (Figure 2). All of them  
14  
15 were possibly occupied by at-risk patients. It should be noted that EHH does not have a  
16  
17 hematological ward any longer. In a 10-month period, about 8 inside and 4 outside air  
18  
19 samples were collected from each unit per week (Table I). Approximately 64 indoor and 48  
20  
21 outdoor air samples were obtained per week, for a total of 3,885 air samples. Weekly clinical  
22  
23 monitoring of high-risk, hospitalized patients, by infectious control practitioners, was  
24  
25 scheduled.

### 26 27 28 29 **Environmental survey**

30  
31 The environmental survey consisted of monitoring air samples inside and outside  
32  
33 selected wards (2 blocks were monitored per day).

### 34 35 36 ***Sampling by the non-cultivable method***

37  
38 Outdoor airborne fungal spore concentrations were monitored continuously with 7-day  
39  
40 Hirst-type spore traps (VPPS 2000, Lanzoni, Bologna, Italy) at a flow rate of 10 L.min<sup>-1</sup>. Air  
41  
42 drawn in by suction port was directly impacted on adhesive tape cut daily into segments.

1  
2  
3  
4  
5  
6  
7  
8  
9  
10  
11  
12  
13  
14  
15  
16  
17  
18  
19  
20  
21  
22  
23  
24  
25  
26  
27  
28  
29  
30  
31  
32  
33  
34  
35  
36  
37  
38  
39  
40  
41  
42  
43  
44  
45  
46  
47  
48  
49

|           |          | Medical unit                   |                 | ICU                       |                           | Medical unit   |                | Medical unit   |                | Kidney and pancreas transplantation unit |                 | ICU             |                 | ICU             |                 |
|-----------|----------|--------------------------------|-----------------|---------------------------|---------------------------|----------------|----------------|----------------|----------------|------------------------------------------|-----------------|-----------------|-----------------|-----------------|-----------------|
|           | Sampling | Morning                        | Afternoon       | Morning                   | Afternoon                 | Morning        | Afternoon      | Morning        | Afternoon      | Morning                                  | Afternoon       | Morning         | Afternoon       | Morning         | Afternoon       |
| Monday    | Outdoor  | Building porch                 | Building porch  | Building porch            | Building porch            | -              | -              | -              | -              | -                                        | -               | -               | -               | -               | -               |
|           | Indoor   | Room + Corridor                | Room + Corridor | Corridor + treatment room | Corridor + treatment room | -              | -              | -              | -              | -                                        | -               | -               | -               | -               | -               |
| Tuesday   | Outdoor  | -                              | -               | -                         | -                         | Building porch | Building porch | -              | -              | -                                        | -               | Building porch  | Building porch  | -               | -               |
|           | Indoor   | -                              | -               | -                         | -                         | 2 Corridors    | 2 Corridors    | -              | -              | -                                        | -               | Room + Corridor | Room + Corridor | -               | -               |
| Wednesday | Outdoor  | -                              | -               | -                         | -                         | -              | -              | Building porch | Building porch | Building porch                           | Building porch  | -               | -               | -               | -               |
|           | Indoor   | -                              | -               | -                         | -                         | -              | -              | 2 Corridors    | 2 Corridors    | Room + Corridor                          | Room + Corridor | -               | -               | -               | -               |
| Thursday  | Outdoor  | Building porch                 | Building porch  | -                         | -                         | -              | -              | -              | -              | -                                        | -               | -               | -               | Building porch  | Building porch  |
|           | Indoor   | Room + Corridor                | Room + Corridor | -                         | -                         | -              | -              | -              | -              | -                                        | -               | -               | -               | Room + Corridor | Room + Corridor |
| Friday    | Outdoor  | Additional sampling, if needed |                 |                           |                           |                |                |                |                |                                          |                 |                 |                 |                 |                 |
|           | Indoor   |                                |                 |                           |                           |                |                |                |                |                                          |                 |                 |                 |                 |                 |

**Table I:** Description of manual air sampling sites monitored at Edouard Herriot Hospital

1  
2  
3 Mean daily fungal spore concentrations were assessed for each segment by optical  
4 microscopy (Axiostar<sup>®</sup>, Carl Zeiss, Göttingen, Germany). Spore counts were expressed as  
5 spores/m<sup>3</sup>/day. The Hirst-type spore trap was placed on the rooftop of a block extension  
6 consisting of a prefabricated floor located on the north side, just in front of the deconstruction  
7 site. It allowed daily monitoring of spore concentrations as total fungal load and  
8 Aspergillaceae fungal load (i.e., *Aspergillus* spp. + *Penicillium* spp.). A similar Hirst-type  
9 spore trap was placed throughout the study in the Gerland area (Lyon, France), located a few  
10 km south-west of EHH, and served as negative control.  
11  
12  
13  
14  
15  
16  
17  
18  
19

### 20 ***Sampling by the cultivable method***

21  
22 Air samples were collected twice a day outside and inside wards during 11 months,  
23 according to a standardized protocol (Table I). Each sample was gathered by agar impact  
24 sampler (Air Ideal<sup>®</sup>, bioMérieux, Marcy l'Etoile, France) in 90-mm diameter Petri dishes  
25 containing Sabouraud Chloramphenicol agar. Air intake velocity of this agar impact sampler  
26 was 100 L/min. Two plates were seeded at each sample site. Each outdoor plate was seeded  
27 for 1 min. Indoor plates were seeded for 2½ min, resulting in air volume of 250 L. One of  
28 these plates was incubated for 48 h at 37°C to grow thermotolerant *A. fumigatus* species.<sup>23</sup>  
29 The other plate was incubated for 5 days at 30°C to allow growth of all fungi. Colonies were  
30 then counted and identified at the genus level on the basis of macroscopic and microscopic  
31 characteristics (lactophenol blue-stained preparations). The data are expressed as colony-  
32 forming units per cubic meter.  
33  
34  
35  
36  
37  
38  
39  
40  
41  
42  
43  
44  
45  
46

### 47 **Prospective clinical survey**

#### 48 ***Patient inclusion***

49  
50 All hospitalized patients were surveyed prospectively at the hospital level and were  
51 eligible for inclusion. IA was classified as proven, probable, and possible or excluded  
52 according to European Organization for research and Treatment of Cancer/ Invasive Fungal  
53  
54  
55  
56  
57  
58  
59  
60

1  
2  
3 Infections Cooperative Group (EORTC) and the National Institute of Allergy and Infectious  
4 Diseases Mycoses Study Group (MSG) criteria.<sup>24</sup> Only cases diagnosed after hospital  
5 admission were included. Cases were categorized into 3 groups, according to the time  
6 between hospital admission and diagnosis: community-acquired, undetermined and  
7 nosocomial. Community-acquired cases were defined as incident cases imported from outside  
8 the hospital. Undetermined cases were defined as incident cases with lag time ranging from 1  
9 to 9 days between admission and the first IA signs. Probable nosocomial cases were defined  
10 as incident IA with lag time between admission and symptoms onset of at least 10 days.  
11 Clinical manifestations of IA vary widely and may develop in different clinical scenarios.<sup>25-27</sup>

### 22 **Case detection**

23 Case detection was based on prospective surveillance of:

- 24 • antifungal therapies (e.g., voriconazole, posaconazole, itraconazole,  
25 caspofungin and amphotericin B distributed by the hospital pharmacy)  
26 administered to patients by pharmacy informatics software
- 27 • mycological results positive for *Aspergillus spp.*, and reporting of suspected  
28 cases by hospital clinicians and infection control practitioners.

29 All suspected cases were investigated by 2 infection control practitioners (1 resident  
30 and 1 physician). External validation was requested in case of uncertain diagnosis by  
31 standardized chart, allowing the collection of demographic characteristics, disease history,  
32 clinical features, mycological, biological and radiological data, antifungal therapy, and  
33 disease outcome.

### 34 ***A. fumigatus* collection**

35 During the study, a maximum of 4 *A. fumigatus* colonies per day among all *A.*  
36 *fumigatus* environmental cultures incubated at 37°C were arbitrarily isolated and frozen. All  
37 *A. fumigatus* clinical isolates of interest also were frozen at -20°C. In total, 400 *A. fumigatus*

1  
2  
3 isolates, corresponding to maximal laboratory capacity and budget, were constituted  
4  
5 arbitrarily.  
6

### 7 ***Molecular identification of Aspergillus isolates***

8  
9 All *A. fumigatus* isolates stored will be identified retrospectively at the species level by  
10 sequencing  $\beta$ -tubulin gene (*benA*, using Bt2a/BT2b primers). Isolates will be subcultured on  
11 Sabouraud Dextrose Chloramphenicol agar for 48 h at 37°C. A piece of approximately 1 cm<sup>2</sup>  
12 of culture will be cut and transferred to microtubes for DNA extraction with QIAamp DNA  
13 blood mini kits (Qiagen, Courtaboeuf, France) according to the manufacturer's instructions.  
14 All isolates will be identified by partial sequencing of  $\beta$ -tubulin gene (*benA*, using Bt2a/BT2b  
15 primers). Sequence alignments will be analyzed by Chromas Lite, v2.01  
16 (<http://technelysium.com.au>) and compared with genome sequences in GenBank and  
17 MycoBank. The results will be considered acceptable if homologies with other entries in the  
18 databases used for comparison are >99%.  
19  
20  
21  
22  
23  
24  
25  
26  
27  
28  
29  
30  
31

### 32 ***Genotyping of A. fumigatus isolates***

33  
34 Isolates will be genotyped by multiple-locus variable-number tandem-repeat analysis  
35 (MLVA) based on selected variable-number tandem-repeat (VNTR) polymorphism. The  
36 MLVA protocol for *A. fumigatus* genotyping targeting 10 markers will be adapted from  
37 Thierry *et al.* for multiplexing and capillary electrophoresis (CE).<sup>28</sup> One primer couple will be  
38 modified to provide shorter amplicons while ensuring the absence of overlaps across VNTR  
39 loci. Primers targeting new VNTR flanking regions have been designed by Primer3Plus  
40 software. MLVA primers for 10 loci and the fluorescent dyes in CE are enumerated in Table  
41 II. MLVA polymerase chain reactions (PCRs) were performed in 2 multiplexes in a final  
42 volume of 50  $\mu$ l containing: 1-5 ng of DNA, 1X Multiplex PCR Master Mix (Qiagen,  
43 Courtaboeuf, France) and 0.2  $\mu$ M of each flanking primer. The initial denaturation step at  
44 95°C for 10 min was followed by 35 cycles, consisting of denaturation at 95°C for 30 s,  
45  
46  
47  
48  
49  
50  
51  
52  
53  
54  
55  
56  
57  
58  
59  
60

1  
2  
3 primer annealing at 58°C for 40 s, and elongation at 72°C for 10 min. The final extension step  
4  
5 was set at 60°C for 10 min. PCR products were diluted 1:50 in deionized water, and 1 µL of  
6  
7 the diluted sample was added to 18.5 µL formamide and 0.1 µL of GeneScan™ 500 LIZ™  
8  
9 dye size standard (ThermoFisher, Life Technologies, Courtaboeuf, France). All samples were  
10  
11 denatured for 5 min at 95°C, then cooled to 4°C before being subjected to capillary  
12  
13 electrophoresis in a 3130 XL DNA analyzer (Applied-Biosystems, Courtaboeuf, France) with  
14  
15 3130 POP7 polymer (Applied-Biosystems). Each VNTR locus was identified by color and  
16  
17 size in electropherograms by GeneScan® analysis (Applied-Biosystems, Courtaboeuf,  
18  
19 France). Fragment sizes were converted to repeat numbers based on the formula: number of  
20  
21 repeats (bp) = fragment size (bp) – flanking regions (bp)/repeat size (bp). Absent PCR  
22  
23 products were designated an allele number, e.g., ‘-1’. Phylogenetic relationships between  
24  
25 isolates will be studied, generating a minimum spanning tree with PHYLOViZ 2.0.<sup>29</sup>  
26  
27  
28

### 29 ***Antifungal susceptibility testing***

31  
32 Briefly, the antifungal susceptibility of stored *A. fumigatus* isolates to itraconazole,  
33  
34 voriconazole and amphotericin B will be analyzed by Etest® on RPMI medium supplemented  
35  
36 with 2% glucose, according to the manufacturer’s instructions. A conidial suspension adjusted  
37  
38 at 0.5 McFarland will be inoculated on RPMI 1640 agar plates (bioMérieux). Etest® strips  
39  
40 (bioMérieux) will then be applied, and the plates incubated for 48 h at 37°C. Minimal  
41  
42 inhibitory concentrations (MICs) of amphotericin B, itraconazole, voriconazole, posaconazole  
43  
44 and will be tested after 24-h and 48-h incubation, respectively, depending on growth rate.<sup>30</sup>  
45  
46 They will be estimated visually as no-growth endpoints, where the edge of the inhibition  
47  
48 ellipse intersects the side of the Etest® strips.  
49  
50  
51  
52  
53  
54  
55  
56  
57  
58  
59  
60

1  
2  
3  
4  
5  
6  
7  
8  
9  
10  
11  
12  
13  
14  
15  
16  
17  
18  
19  
20  
21  
22  
23  
24  
25  
26  
27  
28  
29  
30  
31  
32  
33  
34  
35  
36  
37  
38  
39  
40  
41  
42  
43  
44  
45  
46  
47  
48  
49

| VNTR                | Fluorochromes       | Primer sequences (5' to 3')                                     | Allele size range (bp)                                   |
|---------------------|---------------------|-----------------------------------------------------------------|----------------------------------------------------------|
| Multiplex 1<br>CE 1 | Asp 167             | F: ATTO565- TGAGATGGTAACTTACGTAGCGC<br>R: CGCTCCCACCGTTACCAAC   | 374-422                                                  |
|                     | Asp 330             | F: ATTO550- ATCTGGTCGCGAAATTCCTCT<br>R: TCTTCGGCCTTTTCATCCC     | 152-218                                                  |
|                     | Asp 345             | F: Yakima Yellow- TCTCCAACCCTTCGGACG<br>R: GCCGGAAGAGCATGAAGACA | 191-246                                                  |
|                     | Asp 443             | F: ATTO565- AAGCTTCGTCTGGCGAAGAG<br>R: GCACGTGTACGGTGTTCCTG     | 154-280                                                  |
|                     | Asp 446             | F: 6-FAM- CGATCATGTTTGCCTGAGGA<br>R: CCGACAGCATCGAGCAACTA       | 197-260                                                  |
|                     | Multiplex 2<br>CE 2 | Asp 20                                                          | F: 6-FAM- GGGAAGAGAGGAACCGATCC<br>R: CGCAGTGGGCAGTTTGAAT |
| Asp 165             |                     | F: Yakima Yellow- TGATGGGCCGCGAGTCG<br>R: GCACCTGCTTGTCGATTTCGT | 154-214                                                  |
| Asp 202             |                     | F: ATTO565- AGGATCACTGCCCTCAACCC<br>R: CCGAAATCCGCGGGA          | 200-296                                                  |
| Asp 204bis          |                     | F: ATTO565- ATTGGGAAGAGACGGGGTAT<br>R: GTCCTCACTTTTGCCTTGGT     | 134-178                                                  |
| Asp 252             |                     | F: ATTO550- CAGATTGGAGACACGAAGCG<br>R: ACCACGGATTGCCAAGGA       | 176-224                                                  |

CE: capillary electrophoresis F: forward R: reverse

Table II: MLVA primers and fluorescence dyes used in each multiplex reaction

## Meteorological surveillance

Meteorological conditions monitored were temperature (°C), relative humidity (%), wind direction and speed (km/h). They were recorded every 2 h by Meteociel, the French regional meteorological station at Bron, 5 km from EHH (Figure 1).

## Data analysis

### *Data quality control*

Location of and information on sampling sites were recorded on paper and electronic database. To avoid typing errors, a computer model was created to clean up the electronic database. Every detected error was discussed by the infection control team and screened to assess its reliability. *A. fumigatus* isolates stored for data collection were correctly identified in a strain bank. Antifungal treatments, delivered by the hospital pharmacy, and microbiological data were extracted every week from infection control practitioners. Deconstruction work meetings involving clinicians, infection control practitioners and engineers, held every month, to ensure conformity with and respect of French deconstruction work guidelines.

### *Statistical analysis*

Descriptive statistics, such as means, standard deviations (or medians and quartiles), numbers and percentages, have been obtained for indoor and outdoor fungal loads. Incidence rates will be calculated as the ratio of detected IA cases over the population at risk during the study period. Generalized linear models (appropriate for outcomes) will examine correlations between meteorological parameters and fungal contamination. To compare results obtained with cultivable and non-cultivable methods, Pearson correlation coefficients or Spearman's rank correlation coefficients ( $r$ ) will be applied according to data normality. Time series, by the non-cultivable method, autocorrelation and cross-correlation across sites (EHH and Gerland), including meteorological factors at different time scales and time lag, will be studied.  $P < 0.05$  values will be considered to be statistically significant. Statistical analyses will be performed with R language (V 3.0.2).



## DISCUSSION

1  
2  
3  
4  
5  
6  
7  
8  
9  
10  
11  
12  
13  
14  
15  
16  
17  
18  
19  
20  
21  
22  
23  
24  
25  
26  
27  
28  
29  
30  
31  
32  
33  
34  
35  
36  
37  
38  
39  
40  
41  
42  
43  
44  
45  
46  
47  
48  
49  
50  
51  
52  
53  
54  
55  
56  
57  
58  
59  
60

Clinical and environmental monitoring was reinforced during deconstruction work, according to standard French recommendations.<sup>31</sup> Outdoor and indoor environmental monitoring of contamination was implemented at EHH to prevent high-risk airborne fungal situations.

The present study addresses several questions. Its main objective is to detect clinical cases as soon as possible to adequately manage invasive fungal infection risk in hospital during major deconstruction work and report new findings for future guidelines. Are national recommendations on protective measures in high-risk units efficient in shielding patients from *A. fumigatus* aerocontamination? Totally, 3,885 air samples were collected between February 23, 2015 and December 17, 2015. Air specimens, assessed by the cultivable method, were grouped into 2,141 indoor and 1,744 outdoor samples. A total of 296 days of recording were undertaken with the non-cultivable method. The high frequency and number of samples collected in this study during the 3 deconstruction periods will allow powerful statistical analysis to evaluate the efficiency of protective measures and reduce fungal contamination.

One of its objectives is to scrutinize the performance of non-cultivable methods of outdoor *Aspergillus* aerocontamination monitoring, such as Hirst-type spore traps, and to ascertain the impact of MP on *Aspergillus* aerocontamination. One preliminary study demonstrated potential interest in monitoring outdoor contamination.<sup>22</sup> Complete data on airborne fungal concentration will be analyzed by cultivable and non-cultivable sampling methods.<sup>32,33</sup> Cultivable and non-cultivable methods will be compared, which results could improve current prevention guidelines by providing early warning systems to hospitals.

Part of the study analysis evaluated the impact of MP on airborne fungal contamination. The relationship between meteorological parameters and fungal spore concentrations has already been scrutinized.<sup>34,35</sup> However, no study has investigated the role of meteorological factors in outdoor and indoor air contamination during construction works. A better understanding of MP impact on airborne fungi is needed to see if it could help to assess high-risk situations during construction work in hospital.

1  
2  
3  
4  
5  
6  
7  
8  
9  
10  
11  
12  
13  
14  
15  
16  
17  
18  
19  
20  
21  
22  
23  
24  
25  
26  
27  
28  
29  
30  
31  
32  
33  
In addition, the present study compares the genetic diversity of clinical and environmental *A. fumigatus* isolates and profiles their antifungal susceptibility patterns. The aim is to describe *A. fumigatus* diversity over deconstruction periods along with genetic correlations between environmental and clinical strains collected. Only a few authors have demonstrated links between clinical and environmental genotypes, and only a small number of environmental strains were included in the analysis, limiting the possibility of finding matches.<sup>36,37</sup> The present work provides considerable data on potential IA outbreaks and determines genetic patterns among *A. fumigatus* isolates (Figure 3). Comparison of several *A. fumigatus* typing techniques has suggested that methods based on short tandem repeats combine high discriminatory power, unambiguous interpretation and significant interlaboratory reproducibility.<sup>37-39</sup> MLVA based on 10 VNTR markers will be tested in this study: it has already permitted to evaluate *A. fumigatus* dispersion and diversity in the environment.<sup>28</sup> The MLVA-10 protocol normally employs singleplex PCRs and agarose gel electrophoresis (AE).<sup>28</sup> While traditional AE is relatively cheap, it is also time-consuming. In this study, a multiplex PCR system with multicolor CE for the MLVA-10 panel was designed and provided 97% typeability of isolates, good reproducibility and high discriminatory power. The main advantage of this new MLVA is the high throughput that is facilitated by multiplex PCR and capillary electrophoresis.

34  
35  
36  
37  
38  
39  
40  
41  
42  
43  
44  
45  
46  
47  
48  
49  
50  
51  
52  
53  
54  
55  
56  
57  
58  
59  
60  
The present study evaluates the antifungal susceptibility pattern of environmental and clinical isolates collected. The past decade has seen worldwide reports of azole drug resistance, with prevalence depending on country.<sup>12,40-42</sup> Recently, Choukri *et al.*<sup>13</sup> observed that the overall prevalence of azole resistance in France was about 1.8% in unselected clinical *A. fumigatus* isolates. Resistance has also been encountered in the environment, but possible linkage between clinical resistance and environmental usage of azole fungicides is still unclear.<sup>43,44</sup> Environmental acquisition and dispersion of resistance have been reinforced by IA attributed to azole-resistant *A. fumigatus* isolates in patients who have never ever been subjected to azole therapy.<sup>45</sup> Determination of the prevalence of azole resistance may contribute to better management of IA cases.

1 Azole resistance and genetic patterns can provide experimental data to evaluate correlations between  
2 clinical and environmental isolates and clearly understand *A. fumigatus* dispersion during large demolition  
3 programs.  
4  
5

6  
7 This work had some limitations. Adjustment of MP could change the data analysis and conclusions.  
8  
9 As IA incubation time is unknown or variable, ranging from a few days to 3 months, its diagnosis may  
10 involve some bias.<sup>46-50</sup> Precise definition by EORTC/MSG was respected to identify IA cases and reduce  
11 misclassification.<sup>24</sup> This protocol could not be implemented during a baseline period before construction  
12 work began. Microbiological identification will focus only on *Aspergillus spp.* because it is the leading  
13 pathogen responsible for IA.<sup>3</sup> To improve study outcomes, data on airborne fungal colonization in hospital  
14 need to be analyzed in association with indoor air-handling systems. Although 2 air sampling collectors  
15 were used in the study, no particle counter was tested.  
16  
17  
18  
19  
20  
21  
22  
23

24  
25 A combined approach could deliver meaningful conclusions on *Aspergillus spp.* dispersion and  
26 hopefully give new insights into improvement of environmental monitoring and of hospital guidelines  
27 during major demolition work. This study fits in with larger, ongoing exposome research based on increased  
28 knowledge of connections between environmental exposure and health.<sup>51</sup>  
29  
30  
31  
32  
33  
34  
35  
36  
37  
38  
39  
40  
41  
42  
43  
44  
45  
46  
47  
48  
49  
50  
51  
52  
53  
54  
55  
56  
57  
58  
59  
60

## DECLARATIONS

**Contributors:** STL, EM, CD, LH, and TB acquired the original data for this study. STL, EM, CD, TB, JG, FB, MPG, and PV formulated study methodology. STL, EM, MPG and PV designed the protocol. CD, TB, PC, DD and MW helped with manuscript writing and language review. All authors contributed to revisions and approved the final manuscript version.

**Funding:** This study was supported by Laboratoires ANIOS and the Department of Environment & Public Health, Faculty of Medicine, Université Lyon, Lyon, France and Edouard Herriot Hospital, Lyon, France.

### Competing interests

None declared.

**Acknowledgements:** The authors thank all hospital department chiefs for study participation. They also thank the EA 7380 Dynamyc Team from Université Paris Est, France, the Mycology and Parasitology Institute of Lyon and Analyzair<sup>®</sup> Society, Lyon, France, for providing invaluable advice.

## REFERENCES

- 1  
2  
3 [1] Denning DW. Invasive aspergillosis. *Clin Infect Dis* 1998;26:781-805.  
4  
5  
6 [2] Marr KA, Patterson T, Denning D. Aspergillosis. Pathogenesis, clinical manifestations and therapy.  
7  
8 *Infect Dis Clin North Am* 2002;16:875-94.  
9  
10  
11 [3] Garcia-Vidal C, Upton A, Kirby KA, *et al.* Epidemiology of invasive mold infections in allogeneic stem  
12  
13 cell transplant recipients: biological risk factors for infection according to time after transplantation. *Clin*  
14  
15 *Infect Dis* 2008;47:1041-50.  
16  
17  
18 [4] Nicolle MC, Bénét T, Thiebaut A, *et al.* Invasive aspergillosis in patients with hematologic  
19  
20 malignancies: incidence and description of 127 cases enrolled in a single institution prospective survey from  
21  
22 2004 to 2009. *Haematologica* 2011;96:1685-91.  
23  
24  
25  
26 [5] Hadrich I, Makni F, Sellami H, *et al.* Invasive aspergillosis: epidemiology and environmental study in  
27  
28 haematology patients (Sfax, Tunisia). *Mycoses* 2010;53:443-7.  
29  
30  
31 [6] Gangneux JP, Camus C, Philippe B. Epidemiology of and risk factors for invasive aspergillosis in  
32  
33 nonneutropenic patients. *Rev Mal Respir* 2008;25(2):139-53.  
34  
35 [7] López-Medrano F, Silva JT, Fernández-Ruiz M, *et al.* Risk factors associated with early invasive  
36  
37 pulmonary aspergillosis in kidney transplant recipients. Results from a multinational matched case-control  
38  
39 study. *Am J Transplant* 2016;16(7):2148-57.  
40  
41  
42 [8] Lortholary O, Gangneux JP, Sitbon K, *et al.* Epidemiological trends in invasive aspergillosis in France:  
43  
44 the SAIF network (2005-2007). *Clin Microbiol Infect* 2011;17:1882-9.  
45  
46  
47 [9] Fuhren J, Voskuil WS, Boel CH, *et al.* High prevalence of azole resistance in *Aspergillus fumigatus*  
48  
49 isolates from high-risk patients. *J Antimicrob Chemother* 2015;70:2894-8.  
50  
51  
52 [10] Chowdhary A, Kathuria S, Xu J, *et al.* Emergence of azole-resistant *Aspergillus fumigatus* strains due  
53  
54 to agricultural azole use creates an increasing threat to human health. *PLoS Pathog* 2013;9(10):e1003633.  
55  
56  
57  
58  
59  
60

- 1  
2  
3  
4  
5  
6  
7  
8  
9  
10  
11  
12  
13  
14  
15  
16  
17  
18  
19  
20  
21  
22  
23  
24  
25  
26  
27  
28  
29  
30  
31  
32  
33  
34  
35  
36  
37  
38  
39  
40  
41  
42  
43  
44  
45  
46  
47  
48  
49  
50  
51  
52  
53  
54  
55  
56  
57  
58  
59  
60
- [11] Vermeulen E, Lagrou K, Verweij PE. Azole resistance in *Aspergillus fumigatus*: a growing public health concern. *Curr Opin Infect Dis* 2013;26:493-500.
- [12] Lavergne RA, Morio F, Favennec L, *et al*. First description of azole-resistant *Aspergillus fumigatus* due to TR46/Y121F/T289A mutation in France. *Antimicrob Agents Chemother* 2015;59(7):4331-5.
- [13] Choukri F, Botterel F, Sitterlé E, *et al*. Prospective evaluation of azole resistance in *Aspergillus fumigatus* clinical isolates in France. *Med Mycol* 2015;53:593-6.
- [14] O’Gorman CM. Airborne *Aspergillus fumigatus* conidia: a risk factor for aspergillosis. *Fung Biol Rev* 2011;25:151-7.
- [15] Gangneux JP, Adjidé CC, Bernard L, *et al*. Quantitative assessment of fungal risk in the case of construction works in healthcare establishments: proposed indicators for the determination of the impact of management precautions on the risk of fungal infection. *J Mycol Med* 2012;22:64-71.
- [16] Kanamori H, Rutala WA, Sickbert-Bennett EE, *et al*. Review of fungal outbreaks and infection prevention in healthcare settings during construction and renovation. *Clin Infect Dis* 2015;61:433-4.
- [17] Perraud P, Piens MA, Nicoloyannis N, *et al*. Invasive nosocomial pulmonary aspergillosis: risk factors and hospital building works. *Epidemiol Infect* 1987;99:407-12.
- [18] Bénet T, Nicolle MC, Thiebaut A, *et al*. Reduction of invasive aspergillosis incidence among immunocompromised patients after control of environmental exposure. *Clin Infect Dis* 2007;15;45(6):682-6.
- [19] Méheust D, Le Cann P, Reboux G, *et al*. Indoor fungal contamination: health risks and measurement methods in hospitals, homes and workplaces. *Crit Rev Microbiol* 2014;40:248-60.
- [20] Reboux G, Gbaguidi-Haore H, Bellanger AP, *et al*. A 10-year survey of fungal aerocontamination in hospital corridors: a reliable sentinel to predict fungal exposure risk? *J Hosp Infect* 2014;87:34-40.
- [21] Fournel I, Sautour M, Lafon I, *et al*. Airborne *Aspergillus* contamination during hospital construction works: efficacy of protective measures. *Am J Infect Control* 2010;38(3):189-94.

- 1  
2  
3  
4  
5  
6  
7  
8  
9  
10  
11  
12  
13  
14  
15  
16  
17  
18  
19  
20  
21  
22  
23  
24  
25  
26  
27  
28  
29  
30  
31  
32  
33  
34  
35  
36  
37  
38  
39  
40  
41  
42  
43  
44  
45  
46  
47  
48  
49  
50  
51  
52  
53  
54  
55  
56  
57  
58  
59  
60
- [22] Dananché C, Gustin MP, Cassier P, *et al.* Evaluation of hirst-type spore trap to monitor environmental fungal load in hospital. *Plos One* 2017;12(5):e0177263.
- [23] Boff C, Brun CP, Miron D, *et al.* Technical note: The effect of different incubation temperatures on the recovery of *Aspergillus* species from hospital air. *Am J Infect Control* 2012;40:1016-7.
- [24] Pauwa BD, Walsh TJ, Donnelly JP, *et al.* Revised Definitions of Invasive Fungal Disease from the European Organization for Research and Treatment of Cancer/Invasive Fungal Infections Cooperative Group and the National Institute of Allergy and Infectious Diseases Mycoses Study Group (EORTC/MSG) Consensus Group. *Clin Infect Dis* 2008;46(12):1813-21.
- [25] Hope WW, Walsh TJ, Denning DW. Laboratory diagnosis of invasive aspergillosis. *Lancet Infect Dis* 2005;5(10):609-22.
- [26] Nicolle MC, Bénet T, Vanhems P. Nosocomial or community-acquired? *Med Mycol* 2011;49:24-9.
- [27] Bénet T, Voirin N, Nicolle MC, *et al.* Estimation of the incubation period of invasive aspergillosis by survival models in acute myeloid leukemia patients. *Med Mycol* 2013;51:214-8.
- [28] Thierry S, Wang D, Arné P, *et al.* Multiple-locus variable-number tandem repeat analysis for molecular typing of *Aspergillus fumigatus*. *BMC Microbiol* 2010;10:315.
- [29] Francisco AP, Vaz C, Monteiro PT, *et al.* PHYLOViZ: phylogenetic inference and data visualization for sequence based typing methods. *BMC Bioinformatics* 2012;13:87.
- [30] Espinel-Ingroff A, Arendrup M, Cantón E, *et al.* Multicenter Study of Method-Dependent Epidemiological Cutoff Values for Detection of Resistance in *Candida* spp. and *Aspergillus* spp. to Amphotericin B and Echinocandins for the Etest Agar Diffusion Method. *Antimicrob Agents Chemother* 2016;61(1). pii: e01792-16.
- [31] Risque infectieux fongique et travaux en établissements de santé. Identification du risque et mise en place de mesures de gestion. *Hygiène* 2009;19(1):1-53.
- [32] Fernández-Rodríguez S, Tormo-Molina R, Maya-Manzano JM, *et al.* Outdoor airborne fungi captured by viable and non-viable methods. *Fungal Ecology* 2014;7:16-26.

- 1  
2  
3  
4  
5  
6  
7  
8  
9  
10  
11  
12  
13  
14  
15  
16  
17  
18  
19  
20  
21  
22  
23  
24  
25  
26  
27  
28  
29  
30  
31  
32  
33  
34  
35  
36  
37  
38  
39  
40  
41  
42  
43  
44  
45  
46  
47  
48  
49  
50  
51  
52  
53  
54  
55  
56  
57  
58  
59  
60
- [33] Grinn-Gofron A. Airborne *Aspergillus* and *Penicillium* in the atmosphere of Szczecin (Poland) (2004-2009). *Aerobiologia* 2011;27:67-76.
- [34] Cavallo M, Andreoni S, Martinotti MG, Rinaldi M, Fracchia L. Monitoring environmental *Aspergillus spp.* contamination and meteorological factors in a haematological unit. *Mycopathologia* 2013;176:387-94.
- [35] Mahieu LM, De Dooy JJ, Van Laer FA, Jansens H, Ieven MM. A prospective study on factors influencing aspergillus spore load in the air during renovation works in a neonatal intensive care unit. *J Hosp Infect* 2000;45(3):191-7.
- [36] Guinea J, García de Viedma D, Peláez T, *et al.* Molecular epidemiology of *Aspergillus fumigatus*: an in-depth genotypic analysis of isolates involved in an outbreak of invasive aspergillosis. *J Clin Microbiol* 2011;49(10):3498-503.
- [37] Peláez T, Muñoz P, Guinea J, *et al.* Outbreak of invasive Aspergillosis after major heart surgery caused by spores in the air of the intensive care unit. *Clin Infect Dis* 2012;54(3):e24-31.
- [38] de Valk HA, Meis JF, Klaassen CH. Microsatellite based typing of *Aspergillus fumigatus*: strengths, pitfalls and solutions. *J Microbiol Methods* 2007;69:268-72.
- [39] de Valk HA, Meis JF, Bretagne S, *et al.* Interlaboratory reproducibility of a microsatellite-based typing assay for *Aspergillus fumigatus* through the use of allelic ladders: proof of concept. *Clin Microbiol Infect* 2009;15:180-7.
- [40] van der Linden JW, Snelders E, Kampinga GA, *et al.* Clinical implications of Azole resistance in *Aspergillus fumigatus*, The Netherlands, 2007-2009. *Emerg Infect Dis* 2011;17:1846-54.
- [41] Lelièvre L, Groh M, Angebault C, *et al.* Azole resistant *Aspergillus fumigatus*: an emerging problem. *Med Mal Infect* 2013;43(4):139-45.
- [42] Vermeulen E, Maertens J, Schoemans H, Lagrou K. Azole-resistant *Aspergillus fumigatus* due to TR46/Y121F/T289A mutation emerging in Belgium, July 2012. *Euro Surveill* 2012;17(48). pii: 20326.
- [43] Snelders E, Huis In 't Veld RA, Rijs AJ, *et al.* Possible environmental origin of resistance of *Aspergillus fumigatus* to medical triazoles. *Appl Environ Microbiol* 2009;75(12):4053-7.



- 1  
2  
3  
4  
5  
6  
7  
8  
9  
10  
11  
12  
13  
14  
15  
16  
17  
18  
19  
20  
21  
22  
23  
24  
25  
26  
27  
28  
29  
30  
31  
32  
33  
34  
35  
36  
37  
38  
39  
40  
41  
42  
43  
44  
45  
46  
47  
48  
49  
50  
51  
52  
53  
54  
55  
56  
57  
58  
59  
60
- [44] Kano R, Sobukawa H, Murayama YS, *et al.* *In vitro* resistance of *Aspergillus fumigatus* to azole farm fungicide. *J Infect Chemother* 2016;22:133-6.
- [45] van der Linden JW, Camps SM, Kampinga GA, *et al.* Aspergillosis due to voriconazole highly resistant *Aspergillus fumigatus* and recovery of genetically related resistant isolates from domiciles. *Clin Infect Dis* 2013;57:513-20.
- [46] Balloy V, Huerre M, Latgé JP, *et al.* Differences in patterns of infection and inflammation for corticosteroid treatment and chemotherapy in experimental invasive pulmonary aspergillosis. *Infect Immun* 2005;73(1):494-503.
- [47] Gregg KS, Kauffman CA. Invasive Aspergillosis: Epidemiology, Clinical Aspects, and Treatment. *Semin Respir Crit Care Med* 2015;36(5):662-72.
- [48] Kosmidis C, Denning DW. The clinical spectrum of pulmonary aspergillosis. *Thorax* 2015;70:270-7.
- [49] Meersseman W, Vandecasteele SJ, Wilmer A, *et al.* Invasive aspergillosis in critically ill patients without malignancy. *Am J Respir Crit Care Med* 2004;170:621-5.
- [50] American Academy of Pediatrics. Committee on Infectious Diseases. Red Book, 28<sup>th</sup> edition. Elk Grove Village, IL: American Academy of Pediatrics, 2009.
- [51] Escher BI, Hackermüller J, Polte T, *et al.* From the exposome to mechanistic understanding of chemical-induced adverse effects. *Environ Int* 2017;99:97-106.

**FIGURE LEGENDS**

**Figure 1:** *Location of Edouard Herriot Hospital, Lyon (France)*

**Figure 2:** *Detailed map of Edouard Herriot Hospital and environmental monitoring sampling sites*

**Figure 3:** *Flow chart of protocol study*

For peer review only

1  
2  
3  
4  
5  
6  
7  
8  
9  
10  
11  
12  
13  
14  
15  
16  
17  
18  
19  
20  
21  
22  
23  
24  
25  
26  
27  
28  
29  
30  
31  
32  
33  
34  
35  
36  
37  
38  
39  
40  
41  
42  
43  
44  
45  
46  
47  
48  
49  
50  
51  
52  
53  
54  
55  
56  
57  
58  
59  
60

Figure 1: Location of Edouard Herriot Hospital, Lyon (France)

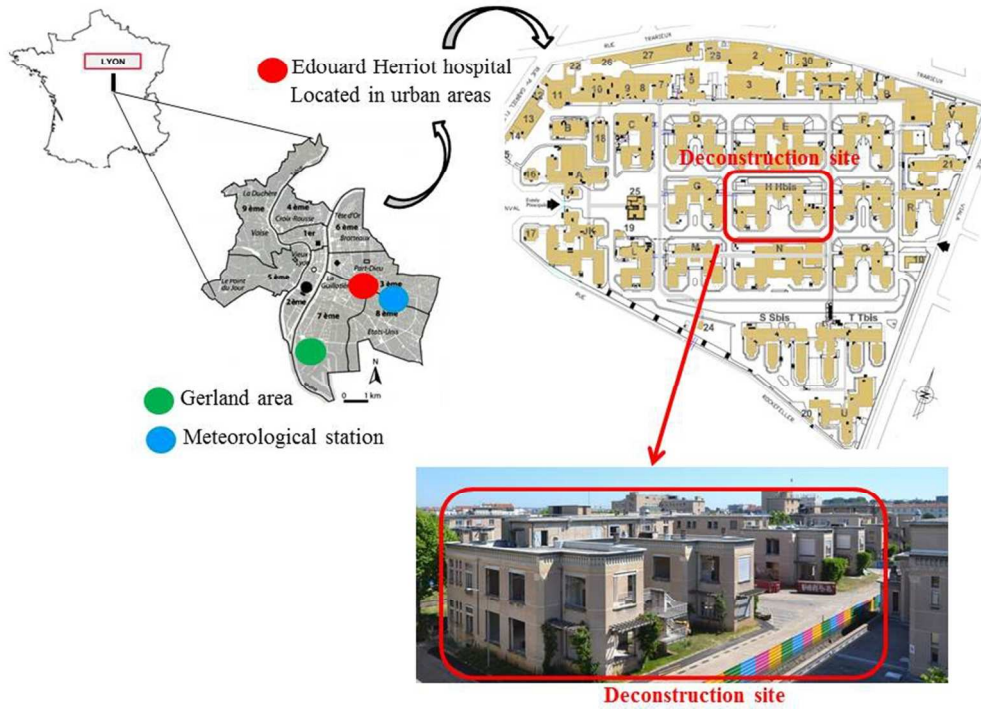

Location of Edouard Herriot Hospital, Lyon (France)

254x190mm (96 x 96 DPI)

ew only

Figure 2: Detailed map of Edouard Herriot Hospital and sampling sites of environmental monitoring

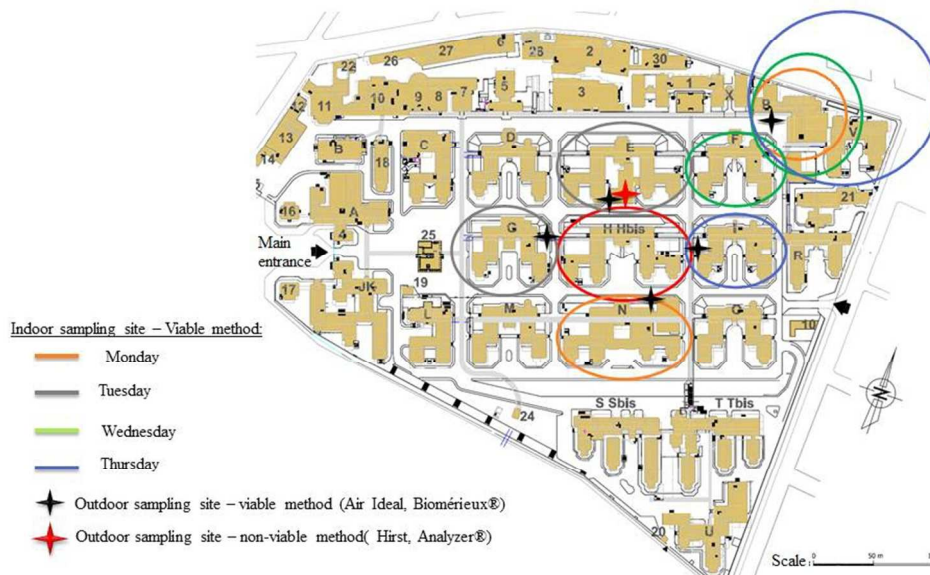

Detailed map of Edouard Herriot Hospital and environmental monitoring sampling sites

254x190mm (96 x 96 DPI)

ew only

1  
2  
3  
4  
5  
6  
7  
8  
9  
10  
11  
12  
13  
14  
15  
16  
17  
18  
19  
20  
21  
22  
23  
24  
25  
26  
27  
28  
29  
30  
31  
32  
33  
34  
35  
36  
37  
38  
39  
40  
41  
42  
43  
44  
45  
46  
47  
48  
49  
50  
51  
52  
53  
54  
55  
56  
57  
58  
59  
60

Figure 3: Flow chart of protocol study

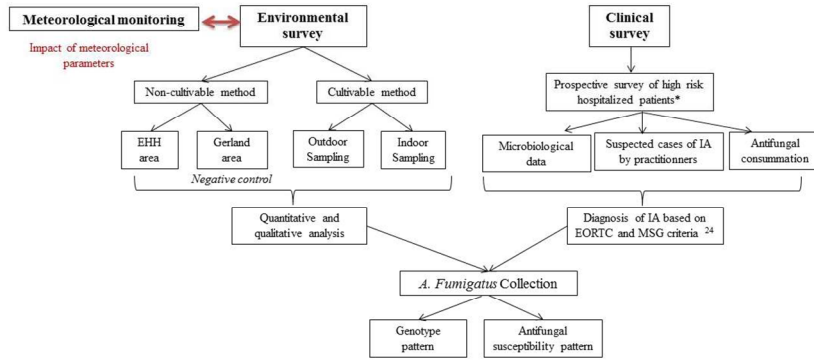

\*Patients at high risk of IA are neutropenic

Flow chart of protocol study

350x190mm (96 x 96 DPI)

review only

# BMJ Open

## Monitoring of clinical strains and environmental fungal aerocontamination to prevent invasive Aspergillosis infections in hospital during large deconstruction work: a protocol study



|                                 |                                                                                                                                                                                                                                                                                                                                                                                                                                                                                                                                                                                                                                                                                                                                                                                                                                                                                                                                                                                                                                                                                                                                                                                                                                                                                                                                                                                                                                                                                                                                                                                                                                                                                                                                                                                                                                                                                                                                                                                                                                                                                                                                                                                                                                                                                                                                                                                                                                                            |
|---------------------------------|------------------------------------------------------------------------------------------------------------------------------------------------------------------------------------------------------------------------------------------------------------------------------------------------------------------------------------------------------------------------------------------------------------------------------------------------------------------------------------------------------------------------------------------------------------------------------------------------------------------------------------------------------------------------------------------------------------------------------------------------------------------------------------------------------------------------------------------------------------------------------------------------------------------------------------------------------------------------------------------------------------------------------------------------------------------------------------------------------------------------------------------------------------------------------------------------------------------------------------------------------------------------------------------------------------------------------------------------------------------------------------------------------------------------------------------------------------------------------------------------------------------------------------------------------------------------------------------------------------------------------------------------------------------------------------------------------------------------------------------------------------------------------------------------------------------------------------------------------------------------------------------------------------------------------------------------------------------------------------------------------------------------------------------------------------------------------------------------------------------------------------------------------------------------------------------------------------------------------------------------------------------------------------------------------------------------------------------------------------------------------------------------------------------------------------------------------------|
| Journal:                        | <i>BMJ Open</i>                                                                                                                                                                                                                                                                                                                                                                                                                                                                                                                                                                                                                                                                                                                                                                                                                                                                                                                                                                                                                                                                                                                                                                                                                                                                                                                                                                                                                                                                                                                                                                                                                                                                                                                                                                                                                                                                                                                                                                                                                                                                                                                                                                                                                                                                                                                                                                                                                                            |
| Manuscript ID                   | bmjopen-2017-018109.R1                                                                                                                                                                                                                                                                                                                                                                                                                                                                                                                                                                                                                                                                                                                                                                                                                                                                                                                                                                                                                                                                                                                                                                                                                                                                                                                                                                                                                                                                                                                                                                                                                                                                                                                                                                                                                                                                                                                                                                                                                                                                                                                                                                                                                                                                                                                                                                                                                                     |
| Article Type:                   | Protocol                                                                                                                                                                                                                                                                                                                                                                                                                                                                                                                                                                                                                                                                                                                                                                                                                                                                                                                                                                                                                                                                                                                                                                                                                                                                                                                                                                                                                                                                                                                                                                                                                                                                                                                                                                                                                                                                                                                                                                                                                                                                                                                                                                                                                                                                                                                                                                                                                                                   |
| Date Submitted by the Author:   | 27-Sep-2017                                                                                                                                                                                                                                                                                                                                                                                                                                                                                                                                                                                                                                                                                                                                                                                                                                                                                                                                                                                                                                                                                                                                                                                                                                                                                                                                                                                                                                                                                                                                                                                                                                                                                                                                                                                                                                                                                                                                                                                                                                                                                                                                                                                                                                                                                                                                                                                                                                                |
| Complete List of Authors:       | <p>Loeffert, Sophie; Fondation Mérieux, Centre International de Recherche en Infectiologie (CIRI), Inserm U1111, CNRS UMR5308, ENS de Lyon, France, Université de Lyon 1., Laboratoire des Pathogènes Emergents-Fondation Mérieux</p> <p>Melloul, Elise; EnvA, UPEC, Université Paris Est, EA 7380 Dynamyc</p> <p>Dananché, Cédric; Hospices Civils de Lyon, Unité d'hygiène, épidémiologie et prévention; Fondation Mérieux, Centre International de Recherche en Infectiologie (CIRI), Inserm U1111, CNRS UMR5308, ENS de Lyon, France, Université de Lyon 1., Laboratoire des Pathogènes Emergents</p> <p>Hénaff, Laetitia; Fondation Mérieux, Centre International de Recherche en Infectiologie (CIRI), Inserm U1111, CNRS UMR5308, ENS de Lyon, France, Université de Lyon 1., Laboratoire des Pathogènes Emergents</p> <p>Bénet, Thomas; Groupement Hospitalier Centre, Hospices Civils de Lyon, France., Unité d'hygiène, épidémiologie et prévention; Fondation Mérieux, Centre International de Recherche en Infectiologie (CIRI), Inserm U1111, CNRS UMR5308, ENS de Lyon, France, Université de Lyon 1., Laboratoire des Pathogènes Emergents</p> <p>Cassier, Pierre; Groupement Hospitalier Centre, Hospices Civils de Lyon, France., Laboratoire de Biologie Sécurité Environnement</p> <p>Dupont, Damien; Hôpital de la Croix Rousse, Hospices Civils de Lyon, Institut de Parasitologie et de Mycologie Médical</p> <p>Guillot, Jacques; EnvA, UPEC, Université Paris Est, EA 7380 Dynamyc</p> <p>Botterel, Françoise; EnvA, UPEC, Université Paris Est, EA 7380 Dynamyc</p> <p>Wallon, Martine; Hôpital de la Croix Rousse, Hospices Civils de Lyon, Institut de Parasitologie et de Mycologie Médical</p> <p>Gustin, Marie-Paule; Fondation Mérieux, Centre International de Recherche en Infectiologie (CIRI), Inserm U1111, CNRS UMR5308, ENS de Lyon, France, Université de Lyon 1, Laboratoire des Pathogènes Emergents; Institut des Sciences Pharmaceutiques et Biologiques (ISPB)-Faculté de Pharmacie, Université Claude Bernard Lyon 1, Département de santé publique</p> <p>Vanhems, Philippe; Fondation Mérieux, Centre International de Recherche en Infectiologie (CIRI), Inserm U1111, CNRS UMR5308, ENS de Lyon, France, Université de Lyon 1., Laboratoire des Pathogènes Emergents-Fondation Mérieux; Groupement Hospitalier Centre, Hospices Civils de Lyon, France., Unité d'hygiène, épidémiologie et prévention</p> |
| <b>Primary Subject Heading</b>: | Public health                                                                                                                                                                                                                                                                                                                                                                                                                                                                                                                                                                                                                                                                                                                                                                                                                                                                                                                                                                                                                                                                                                                                                                                                                                                                                                                                                                                                                                                                                                                                                                                                                                                                                                                                                                                                                                                                                                                                                                                                                                                                                                                                                                                                                                                                                                                                                                                                                                              |

1  
2  
3  
4  
5  
6  
7  
8  
9  
10  
11  
12  
13  
14  
15  
16  
17  
18  
19  
20  
21  
22  
23  
24  
25  
26  
27  
28  
29  
30  
31  
32  
33  
34  
35  
36  
37  
38  
39  
40  
41  
42  
43  
44  
45  
46  
47  
48  
49  
50  
51  
52  
53  
54  
55  
56  
57  
58  
59  
60

|                            |                                                                                                                                  |
|----------------------------|----------------------------------------------------------------------------------------------------------------------------------|
| Secondary Subject Heading: | Infectious diseases, Research methods                                                                                            |
| Keywords:                  | Invasive aspergillosis, Clinical monitoring, Environmental monitoring, Aspergillus fumigatus, Azole resistance, Genetic patterns |
|                            |                                                                                                                                  |

SCHOLARONE™  
Manuscripts

For peer review only

1  
2  
3 **Monitoring of clinical strains and environmental fungal aerocontamination to prevent**  
4 **invasive Aspergillus infections in hospital during large deconstruction work: a protocol**  
5 **study**  
6  
7

8 **Sophie Tiphaine Loeffert<sup>1</sup>, Elise Melloul<sup>2</sup>, Cédric Dananché<sup>1,3</sup>, Laetitia Hénaff<sup>1</sup>, Thomas**  
9 **Bénet<sup>1,3</sup>, Pierre Cassier<sup>4</sup>, Damien Dupont<sup>5</sup>, Jacques Guillot<sup>2</sup>, Françoise Botterel<sup>2</sup>,**  
10 **Martine Wallon<sup>5</sup>, Marie-Paule Gustin<sup>1,6</sup>, Philippe Vanhems<sup>1,3</sup>**  
11

12  
13  
14 Corresponding author: Sophie T. Loeffert, Emergent Pathogens Laboratory – Fondation  
15 Mérieux, Centre International de Recherche en Infectiologie, INSERM U1111, CNRS  
16 UMR5308, ENS de Lyon, Université Claude Bernard, 21, avenue Tony Garnier, Lyon 69007,  
17 France. Email: [sophie.loeffert01@chu-lyon.fr](mailto:sophie.loeffert01@chu-lyon.fr). Telephone: +33.(0)4.72.11.07.20  
18

19  
20  
21 <sup>1</sup>Laboratoire des Pathogènes Emergents-Fondation Mérieux, Centre International de Recherche en  
22 Infectiologie (CIRI), Inserm U1111, CNRS UMR5308, ENS de Lyon, France, Université de Lyon 1.  
23

24  
25 <sup>2</sup>EA 7380 Dynamyc, EnvA, UPEC, Université Paris Est, Créteil, France  
26

27 <sup>3</sup>Unité d'hygiène, épidémiologie et prévention, Groupement Hospitalier Centre, Hospices Civils de  
28 Lyon, France.  
29

30 <sup>4</sup>Laboratoire de Biologie Sécurité Environnement, Groupement Hospitalier Centre, Hospices  
31 Civils de Lyon, France.  
32

33 <sup>5</sup>Institut de Parasitologie et de Mycologie Médical, Hôpital de la Croix Rousse, Lyon, France.  
34

35  
36 <sup>6</sup>Département de santé publique, Institut des Sciences Pharmaceutiques et Biologiques  
37 (ISPB)-Faculté de Pharmacie, Université Claude Bernard Lyon 1, France.  
38

39  
40 **Word count:**

- 41  
42 ➤ Abstract: 232 words  
43  
44 ➤ Text body: 3012 words  
45  
46  
47

48 **Keywords:**

49  
50 Invasive aspergillosis  
51 Clinical monitoring  
52 Environmental monitoring  
53 Azole resistance  
54 *Aspergillus fumigatus*  
55 Genetic patterns  
56  
57



**ABSTRACT**

Introduction: Monitoring fungal aerocontamination is an essential measure to prevent severe invasive aspergillosis (IA) infections in hospitals. One central block among 32 blocks of Edouard Herriot Hospital was entirely demolished in 2015, while care activities continued in surrounding blocks. The main objective was to undertake broad environmental monitoring and clinical surveillance of IA cases to document fungal dispersion during major deconstruction work and to assess clinical risk.

Methods and analysis: A daily environmental survey of fungal loads was conducted in 8 wards located near the demolition site. Air was collected inside and outside selected wards by agar impact samplers. Daily spore concentrations were monitored continuously by volumetric samplers at a flow rate of 10 L.min<sup>-1</sup>. Daily temperature, wind direction and speed as well as relative humidity were recorded by the French meteorological station Meteociel. *Aspergillus fumigatus* strains stored will be genotyped by multiple-locus, variable-number, tandem-repeat analysis. Antifungal susceptibility will be assessed by E-test<sup>®</sup> strips on Roswell Park Memorial Institute medium supplemented with agar. Ascertaining the adequacy of current environmental monitoring techniques in hospital is of growing importance, considering the rising impact of fungal infections and of curative antifungal costs. The present study could improve the daily management of IA risk during major deconstruction work and generate new data to ameliorate and redefine current guidelines.

Ethics and dissemination: This study was approved by the clinical research and ethics committees of Edouard Herriot Hospital.

### Strengths and limitations of this study

- This study is one of the largest ongoing prospective studies to evaluate combined approach of environmental and clinical monitoring in hospital during major deconstruction works.
- The high frequency and number of samples collected in this study during deconstruction works will allow powerful statistical analysis to evaluate the efficiency of protective measures and reduce fungal contamination.
- Non-cultivable methods monitoring outdoor *Aspergillus* aerocontamination for hospital alerts are evaluated.
- Genetic diversity and their antifungal susceptibility profiles of clinical and environmental collected isolates are determined to give complete information on *Aspergillus spp.* dispersion and hopefully give new insights into improvement of environmental monitoring and of hospital guidelines during major demolition work.
- Microbiological identification will focus only on *Aspergillus spp.* because it is the leading pathogen responsible for IA. Although 2 air sampling collectors were used in the study, no particle counter was tested.

### INTRODUCTION

Invasive fungal infections are major threats to immunocompromised patients because of their high incidence and related mortality.<sup>1</sup> They occur through inhalation of airborne conidia with various consequences, such as immune-allergic reactions to invasive aspergillosis (IA), a severe opportunistic disease caused mostly by *Aspergillus fumigatus* (>80%) and, to a lesser extent, by *A. flavus*, *A. niger*, *A. terreus*, and *A. nidulans*.<sup>2,3</sup> IA is a very serious condition, with crude lethality ranging from 50 to 90% and greater mortality in

1  
2  
3 hematological patients.<sup>4,5</sup> Its epidemiology has changed in recent years, surfacing in non-  
4  
5 hematological units, such as intensive care units (ICUs), and increasing in non-neutropenic  
6  
7 hosts treated with corticosteroids or life-long immunosuppressants.<sup>6</sup> The burden of patients at  
8  
9 risk of IA is growing every year because of longer survival and improved care.<sup>7</sup> Azole  
10  
11 antifungals are commonly given to combat IA in many countries, with recent studies reporting  
12  
13 an emerging, worldwide problem: azole drug resistance of *A. fumigatus* isolates.<sup>8-13</sup>

14  
15  
16  
17 *Aspergillus* species are opportunistic pathogens widely distributed in the environment  
18  
19 and easily transported by air because of their conidia size.<sup>13</sup> Construction work in healthcare  
20  
21 settings in past decades has been associated with major IA outbreaks.<sup>4</sup> Construction involving  
22  
23 periods of renovation or deconstruction increases spore release, creating high-risk situations  
24  
25 in hospitals.<sup>1,14,15</sup> In the 1980s, 22 IA cases arose over a 30-month period during building  
26  
27 renovations at Edouard Herriot Hospital (EHH) (Lyon, France).<sup>16</sup> A quasi-experimental study,  
28  
29 conducted in an adult hematology unit of this hospital, underlined the need for monitoring  
30  
31 environmental factors to prevent nosocomial IA.<sup>17</sup> A sampling strategy for fungal monitoring  
32  
33 in hospital was based on study results.<sup>14,18</sup>

34  
35  
36  
37  
38 Recently, an entire block in EHH underwent deconstruction without suspension of  
39  
40 care activities in direct proximity to it. The situation prompted the infection control team to  
41  
42 monitor fungal dispersion and look for cases of *Aspergillus* disease. Only a few studies have  
43  
44 been performed in this context and under similar conditions so that sampling strategies and  
45  
46 analyses differ, indicating varying fungal loads.<sup>15-21</sup> All these investigations have highlighted  
47  
48 the common need for innovative approaches and tools to improve research in the field.<sup>18</sup> Real-  
49  
50 time methods may provide warning systems by monitoring outdoor fungal loads.<sup>21</sup>

1  
2  
3 The purpose of the present work was to carry out broad environmental monitoring and  
4 clinical surveillance of IA cases to better understand fungal dispersion during major  
5 deconstruction work.  
6  
7  
8  
9

## 10 11 12 13 **METHODS**

### 14 **Study objectives**

15  
16  
17 The objective of this study is to provide new data for future guidelines on adequate  
18 management of invasive fungal infection risk in hospital during major deconstruction work.  
19  
20 Its intermediate objectives are to: 1) evaluate non-cultivable methods monitoring outdoor  
21  
22 *Aspergillus* aerocontamination for hospital alerts, 2) assess the impact of meteorological  
23  
24 parameters (MP) on *Aspergillus* aerocontamination, and 3) compare the genetic diversity of  
25  
26 clinical and environmental *A. fumigatus* isolates and ascertain their antifungal susceptibility  
27  
28 profiles.  
29  
30  
31  
32

### 33 **Study site**

34  
35 Built in the 1930s in Lyon, Rhône-Alpes, France, on a 15.5-hectare site, EHH is a  
36  
37 university-affiliated hospital composed of 32 independent blocks divided by tree-planted  
38  
39 walkways and grassy areas. This 850-adult bed tertiary institution provides care to a large  
40  
41 panel of immunocompromised patients (solid organ transplantation, hematopoietic stem cell  
42  
43 transplantation, immunosuppressive treatment, ICU: intensive care unit). The central block  
44  
45 that was demolished measured 0.6 hectares, representing approximately 12.2% of the area  
46  
47 covered by hospital blocks (Figure 1, online video of demolition works:  
48  
49 <https://www.youtube.com/watch?v=Oa7xRufAnhQ>). Three deconstruction periods at EHH  
50  
51 were scheduled between February and December 2015. The first period, between February  
52  
53 and June 2015, consisted of gutting the building and removing asbestos from it. The floors  
54  
55  
56  
57  
58  
59  
60

1  
2  
3 were removed in July and August 2015. Excavation and earthwork took place between  
4  
5 September and December 2015. Finally, concrete was poured at the end of December 2015 to  
6  
7 allow construction of the new building comprising fully-equipped areas (operating rooms,  
8  
9 ICUs and heliport) on 2.5 hectares.  
10

### 11 **Study design**

12  
13  
14 The study was conducted in 8 medical wards located around the demolition site: 4  
15  
16 ICUs, 1 kidney and pancreas transplantation unit, and 3 medical wards (Figure 2). All of them  
17  
18 were possibly occupied by at-risk patients. It should be noted that EHH does not have a  
19  
20 hematological ward any longer. In a 10-month period, about 8 inside and 4 outside air  
21  
22 samples were collected from each unit per week (Table I). Approximately 64 indoor and 48  
23  
24 outdoor air samples were obtained per week, for a total of 3,885 air samples. Weekly clinical  
25  
26 monitoring of high-risk, hospitalized patients, by infectious control practitioners, was  
27  
28 scheduled.  
29  
30

### 31 **Protective measures**

32  
33  
34 Several preventive measures were performed (i) doors and windows in front of the  
35  
36 deconstruction site were maintained closed during the day and allowed for opening at night,  
37  
38 (ii) patient and medical staff movements were limited and special traffic patterns were  
39  
40 designed, (iii) masks were requested for hospitalized or non-hospitalized  
41  
42 immunocompromised patients outside wards to limit fungal exposure, (iv) adhesive  
43  
44 decontamination carpets were installed at the entry of wards, (v) visitors, patients and medical  
45  
46 staff were alerted about fungal exposure due to the deconstruction site. In case of high fungal  
47  
48 exposure, after results of environmental survey, intensive bio-cleaning was performed.  
49  
50

51  
52 Preventive measures were also implemented outdoor, at the deconstruction site to limit fungal  
53  
54 dispersion. Construction site teams received information and education about IA risks. Humid  
55  
56  
57  
58  
59  
60

1  
2  
3 environment was mandatory for all works completed by regular humidification. Furthermore,  
4  
5 ruined buildings rubbles are humidified and covered for evacuation. Circulation pattern for  
6  
7 rubbles evacuation is also designed. Damp cleaning of deconstruction site roads are frequently  
8  
9 realized with, in addition, cleaning of truck wheels.  
10

### 11 **Environmental survey**

12  
13  
14 The environmental survey consisted of monitoring air samples inside and outside  
15  
16 selected wards (2 blocks were monitored per day). Only molds, in particular *Aspergillus* spp.  
17  
18 have been investigated in this study.  
19

### 20 ***Sampling by the non-cultivable method***

21  
22  
23 Outdoor airborne fungal spore concentrations were monitored continuously with 7-day  
24  
25 Hirst-type spore traps (VPPS 2000, Lanzoni, Bologna, Italy) at a flow rate of 10 L.min<sup>-1</sup>. Air  
26  
27 drawn in by suction port was directly impacted on adhesive tape cut daily into segments.  
28  
29  
30  
31  
32  
33  
34  
35  
36  
37  
38  
39  
40  
41  
42  
43  
44  
45  
46  
47  
48  
49  
50  
51  
52  
53  
54  
55  
56  
57  
58  
59  
60

|           | Sampling | Medical unit                   |                 | ICU                       |                           | Medical unit   |                | Medical unit   |                | Kidney and pancreas transplantation unit |                 | ICU             |                 | ICU             |                 |
|-----------|----------|--------------------------------|-----------------|---------------------------|---------------------------|----------------|----------------|----------------|----------------|------------------------------------------|-----------------|-----------------|-----------------|-----------------|-----------------|
|           |          | Morning                        | Afternoon       | Morning                   | Afternoon                 | Morning        | Afternoon      | Morning        | Afternoon      | Morning                                  | Afternoon       | Morning         | Afternoon       | Morning         | Afternoon       |
| Monday    | Outdoor  | Building porch                 | Building porch  | Building porch            | Building porch            | -              | -              | -              | -              | -                                        | -               | -               | -               | -               | -               |
|           | Indoor   | Room + Corridor                | Room + Corridor | Corridor + treatment room | Corridor + treatment room | -              | -              | -              | -              | -                                        | -               | -               | -               | -               | -               |
| Tuesday   | Outdoor  | -                              | -               | -                         | -                         | Building porch | Building porch | -              | -              | -                                        | -               | Building porch  | Building porch  | -               | -               |
|           | Indoor   | -                              | -               | -                         | -                         | 2 Corridors    | 2 Corridors    | -              | -              | -                                        | -               | Room + Corridor | Room + Corridor | -               | -               |
| Wednesday | Outdoor  | -                              | -               | -                         | -                         | -              | -              | Building porch | Building porch | Building porch                           | Building porch  | -               | -               | -               | -               |
|           | Indoor   | -                              | -               | -                         | -                         | -              | -              | 2 Corridors    | 2 Corridors    | Room + Corridor                          | Room + Corridor | -               | -               | -               | -               |
| Thursday  | Outdoor  | Building porch                 | Building porch  | -                         | -                         | -              | -              | -              | -              | -                                        | -               | -               | -               | Building porch  | Building porch  |
|           | Indoor   | Room + Corridor                | Room + Corridor | -                         | -                         | -              | -              | -              | -              | -                                        | -               | -               | -               | Room + Corridor | Room + Corridor |
| Friday    | Outdoor  | Additional sampling, if needed |                 |                           |                           |                |                |                |                |                                          |                 |                 |                 |                 |                 |
|           | Indoor   | Additional sampling, if needed |                 |                           |                           |                |                |                |                |                                          |                 |                 |                 |                 |                 |

Table I: Description of manual air sampling sites monitored at Edouard Herriot Hospital

1  
2  
3 Mean daily fungal spore concentrations were assessed for each segment by optical  
4 microscopy (Axiostar<sup>®</sup>, Carl Zeiss, Göttingen, Germany). Spore counts were expressed as  
5 spores/m<sup>3</sup>/day. The Hirst-type spore trap was placed on the rooftop of a block extension  
6 consisting of a prefabricated floor located on the north side, just in front of the deconstruction  
7 site. It allowed daily monitoring of spore concentrations as total fungal load and  
8 *Aspergillaceae* fungal load (i.e., *Aspergillus* spp. + *Penicillium* spp.). A similar Hirst-type  
9 spore trap was placed throughout the study in the Gerland area (Lyon, France), located a few  
10 km south-west of EHH, and served as negative control.  
11  
12  
13  
14  
15  
16  
17  
18  
19

### 20 ***Sampling by the cultivable method***

21  
22 Air samples were collected twice a day outside and inside wards during 11 months,  
23 according to a standardized protocol (Table I). Each sample was gathered by agar impact  
24 sampler (Air Ideal<sup>®</sup>, bioMérieux, Marcy l'Etoile, France) in 90-mm diameter Petri dishes  
25 containing Sabouraud Chloramphenicol agar. Air intake velocity of this agar impact sampler  
26 was 100 L/min. Two plates were seeded at each sample site. Air sample volume was chosen  
27 according to French guidelines environmental fungal risk control.<sup>22,23</sup> They recommend a  
28 sample volume adapted to the presumed levels of contamination in the environment. Due to  
29 the major demolition works ongoing, outdoor air was considered more contaminated by fungi  
30 than indoor. So in order to avoid overcrowding on the plates, outdoor plates were seeded for  
31 only 1 min corresponding to an air volume of 100L. Indoor samples were supposed to have an  
32 intermediate fungal contamination level due to the preventive measures applied to reduce  
33 environmental contamination inside units. Therefore, Indoor plates were seeded for 2½ min,  
34 resulting in a higher air volume (250L). One of these plates was incubated for 48 h at 37°C to  
35 grow thermotolerant *A. fumigatus* species.<sup>24</sup> The other plate was incubated for 5 days at 30°C  
36 to allow growth of all fungi. Colonies were then counted and identified at the genus level on  
37  
38  
39  
40  
41  
42  
43  
44  
45  
46  
47  
48  
49  
50  
51  
52  
53  
54  
55  
56  
57  
58  
59  
60



1  
2  
3 the basis of macroscopic and microscopic characteristics (lactophenol blue-stained  
4  
5 preparations). The data are expressed as colony-forming units per cubic meter.  
6

### 7 8 **Prospective clinical survey**

#### 9 10 ***Patient inclusion***

11  
12 All hospitalized patients were surveyed prospectively at the hospital level and were  
13  
14 eligible for inclusion. IA was classified as proven, probable, and possible or excluded  
15  
16 according to European Organization for research and Treatment of Cancer/ Invasive Fungal  
17  
18 Infections Cooperative Group (EORTC) and the National Institute of Allergy and Infectious  
19  
20 Diseases Mycoses Study Group (MSG) criteria.<sup>25</sup> Only cases diagnosed after hospital  
21  
22 admission were included. Cases were categorized into 3 groups, according to the time  
23  
24 between hospital admission and diagnosis: community-acquired, undetermined and  
25  
26 nosocomial. Community-acquired cases were defined as incident cases imported from outside  
27  
28 the hospital with apportion of clinical symptoms or positive sample in less than 2 days after  
29  
30 admission Undetermined cases were defined as incident cases with lag time ranging from 1 to  
31  
32 9 days between admission and the first IA signs without any previous negative sample.  
33  
34 Probable nosocomial cases were defined as incident IA with lag time between admission and  
35  
36 symptoms onset of at least 10 days, or if there is some history of negative sample. Clinical  
37  
38 manifestations of IA vary widely and may develop in different clinical scenarios.<sup>26-28</sup>  
39  
40  
41  
42

#### 43 44 ***Case detection***

45 Case detection was based on prospective surveillance of:

- 46  
47 • antifungal therapies (e.g., voriconazole, posaconazole, itraconazole,  
48  
49 caspofungin and amphotericin B distributed by the hospital pharmacy)  
50  
51 administered to patients by pharmacy informatics software  
52  
53
- 54  
55 • mycological results positive for *Aspergillus spp.* corresponding to cultures  
56  
57 showing colony of *A. fumigatus* were investigated  
58  
59  
60

- reporting of suspected cases by hospital clinicians and infection control practitioners.

All suspected cases were investigated by 2 infection control practitioners (1 resident and 1 physician). External validation was requested in case of uncertain diagnosis by standardized chart, allowing the collection of demographic characteristics, disease history, clinical features, mycological, biological and radiological data, antifungal therapy, and disease outcome. If an increased incidence of IA was detected, infections control specialists and mycologists would be solicited to review IA cases.

#### ***A. fumigatus* collection**

During the study, a maximum of 4 *A. fumigatus* colonies per day among all *A. fumigatus* environmental cultures incubated at 37°C were arbitrarily isolated, subcultured on Sabouraud dextrose agar and incubated at 45°C in order to select *A. fumigatus* before being frozen. All *A. fumigatus* clinical isolates of interest also were frozen at -20°C. In total, 400 *A. fumigatus* isolates, corresponding to maximal laboratory capacity and budget, were constituted arbitrarily.

#### ***Molecular identification of Aspergillus isolates***

All *A. fumigatus* isolates stored will be identified retrospectively at the species level by sequencing  $\beta$ -*tubulin* gene (*benA*, using Bt2a/BT2b primers). Isolates will be subcultured on Sabouraud Dextrose Chloramphenicol agar for 48 h at 37°C. A piece of approximately 1 cm<sup>2</sup> of culture will be cut and transferred to microtubes for DNA extraction with QIAamp DNA blood mini kits (Qiagen, Courtaboeuf, France) according to the manufacturer's instructions. All isolates will be identified by partial sequencing of  $\beta$ -*tubulin* gene (*benA*, using Bt2a/BT2b primers). Sequence alignments will be analyzed by Chromas Lite, v2.01

1  
2  
3 (<http://technelysium.com.au>) and compared with genome sequences in GenBank and  
4 MycoBank. The results will be considered acceptable if homologies with other entries in the  
5 databases used for comparison are >99%.  
6  
7

### 8 9 ***Genotyping of A. fumigatus isolates***

10  
11 Isolates will be genotyped by multiple-locus variable-number tandem-repeat analysis  
12 (MLVA) based on selected variable-number tandem-repeat (VNTR) polymorphism. The  
13 MLVA protocol for *A. fumigatus* genotyping targeting 10 markers will be adapted from  
14 Thierry *et al.* for multiplexing and capillary electrophoresis (CE).<sup>29</sup> One primer couple will be  
15 modified to provide shorter amplicons while ensuring the absence of overlaps across VNTR  
16 loci. Primers targeting new VNTR flanking regions have been designed by Primer3Plus  
17 software. MLVA primers for 10 loci and the fluorescent dyes in CE are enumerated in Table  
18 II. MLVA polymerase chain reactions (PCRs) were performed in 2 multiplexes in a final  
19 volume of 50 µl containing: 1-5 ng of DNA, 1X Multiplex PCR Master Mix (Qiagen,  
20 Courtaboeuf, France) and 0.2 µM of each flanking primer. The initial denaturation step at  
21 95°C for 10 min was followed by 35 cycles, consisting of denaturation at 95°C for 30 s,  
22 primer annealing at 58°C for 40 s, and elongation at 72°C for 10 min. The final extension step  
23 was set at 60°C for 10 min. PCR products were diluted 1:50 in deionized water, and 1 µL of  
24 the diluted sample was added to 18.5 µL formamide and 0.1 µL of GeneScan™ 500 LIZ™  
25 dye size standard (ThermoFisher, Life Technologies, Courtaboeuf, France). All samples were  
26 denatured for 5 min at 95°C, then cooled to 4°C before being subjected to capillary  
27 electrophoresis in a 3130 XL DNA analyzer (Applied-Biosystems, Courtaboeuf, France) with  
28 3130 POP7 polymer (Applied-Biosystems). Each VNTR locus was identified by color and  
29 size in electropherograms by GeneScan® analysis (Applied-Biosystems, Courtaboeuf,  
30 France). Fragment sizes were converted to repeat numbers based on the formula: number of  
31 repeats (bp) = fragment size (bp) – flanking regions (bp) / repeat size (bp). Absent PCR  
32  
33  
34  
35  
36  
37  
38  
39  
40  
41  
42  
43  
44  
45  
46  
47  
48  
49  
50  
51  
52  
53  
54  
55  
56  
57  
58  
59  
60

1  
2  
3 products were designated an allele number, e.g., '-1'. Phylogenetic relationships between  
4  
5 isolates will be studied, generating a minimum spanning tree with PHYLOViZ 2.0.<sup>30</sup>  
6

### 7 ***Antifungal susceptibility testing***

8  
9 Briefly, the antifungal susceptibility of stored *A. fumigatus* isolates to itraconazole,  
10 voriconazole and amphotericin B will be analyzed by Etest<sup>®</sup> on RPMI medium supplemented  
11  
12 with 2% glucose, according to the manufacturer's instructions. A conidial suspension adjusted  
13  
14 at 0.5 McFarland will be inoculated on RPMI 1640 agar plates (bioMérieux). Etest<sup>®</sup> strips  
15  
16 (bioMérieux) will then be applied, and the plates incubated for 48 h at 37°C. Minimal  
17  
18 inhibitory concentrations (MICs) of amphotericin B, itraconazole, voriconazole, posaconazole  
19  
20 and will be tested after 24-h and 48-h incubation, respectively, depending on growth rate.<sup>31</sup>  
21  
22 They will be estimated visually as no-growth endpoints, where the edge of the inhibition  
23  
24 ellipse intersects the side of the Etest<sup>®</sup> strips.  
25  
26  
27  
28  
29  
30  
31  
32  
33  
34  
35  
36  
37  
38  
39  
40  
41  
42  
43  
44  
45  
46  
47  
48  
49  
50  
51  
52  
53  
54  
55  
56  
57  
58  
59  
60

|                             | VNTR                        | Fluorochromes                                 | Primer sequences (5' to 3')         | Allele size range (bp) |
|-----------------------------|-----------------------------|-----------------------------------------------|-------------------------------------|------------------------|
| <b>Multiplex 1<br/>CE 1</b> | Asp 167                     | F: ATTO565-<br>R: CGCTCCCACCGTTACCAAC         | TGAGATGGTTAACTTACGTAGCGC            | 374-422                |
|                             | Asp 330                     | F: ATTO550-<br>R: TCTTCGGCCTTTTCATCCC         | ATCTGGTCGCGAAATTCCTCT               | 152-218                |
|                             | Asp 345                     | F: Yakima Yellow-<br>R: GCCGGAAGAGCATGAAGACA  | TCTCCAACCCTTCGGACG                  | 191-246                |
|                             | Asp 443                     | F: ATTO565-<br>R: GCACGTGTACGGTGTTCCTG        | AAGCTTCGTCTGGCGAAGAG                | 154-280                |
|                             | Asp 446                     | F: 6-FAM-<br>R: CCGACAGCATCGAGCAACTA          | CGATCATGTTTGCCTGAGGA                | 197-260                |
|                             | <b>Multiplex 2<br/>CE 2</b> | Asp 20                                        | F: 6-FAM-<br>R: CGCAGTGGGCAGTTTGAAT | GGGAAGAGAGGAACCGATCC   |
| Asp 165                     |                             | F: Yakima Yellow-<br>R: GCACCTGCTTGTCGATTTCGT | TGATGGGCCCGCAGTCG                   | 154-214                |
| Asp 202                     |                             | F: ATTO565-<br>R: CCGAAATCCGCGGGA             | AGGATCACTGCCCTCAACCC                | 200-296                |
| Asp 204bis                  |                             | F: ATTO565-<br>R: GTCCTCACTTTTGCCTTGGT        | ATTGGGAAGAGACGGGGTAT                | 134-178                |
| Asp 252                     |                             | F: ATTO550-<br>R: ACCACGGATTGCCAAGGA          | CAGATTGGAGACACGAAGCG                | 176-224                |

CE: capillary electrophoresis F: forward R: reverse

**Table II:** *MLVA primers and fluorescence dyes used in each multiplex reaction*

## Meteorological surveillance

Meteorological conditions monitored were temperature (°C), relative humidity (%), wind direction and speed (km/h). They were recorded every 2 h by Meteociel, the French regional meteorological station at Bron, 5 km from EHH (Figure 1).

## Data analysis

### *Data quality control*

Location of and information on sampling sites were recorded on paper and electronic database. To avoid typing errors, a computer model was created to clean up the electronic database. Every detected error was discussed by the infection control team and screened to assess its reliability. *A. fumigatus* isolates stored for data collection were correctly identified in a strain bank. Antifungal treatments, delivered by the hospital pharmacy, and microbiological data were extracted every week from infection control practitioners. Deconstruction work meetings involving clinicians, infection control practitioners and engineers, held every month, to ensure conformity with and respect of French deconstruction work guidelines.

### *Statistical analysis*

Descriptive statistics, such as means, standard deviations (or medians and quartiles), numbers and percentages, have been obtained for indoor and outdoor fungal loads. Incidence rates will be calculated as the ratio of detected IA cases over the population at risk during the study period. Generalized linear models (appropriate for outcomes) will examine correlations between meteorological parameters and fungal contamination. To compare results obtained with cultivable and non-cultivable methods, Pearson correlation coefficients or Spearman's rank correlation coefficients ( $r$ ) will be applied according to data normality. Time series, by the non-cultivable method, autocorrelation and cross-correlation across sites (EHH and Gerland), including meteorological factors at different time scales and time lag, will be studied.  $P < 0.05$  values will be considered to be statistically significant. Statistical analyses will be performed with R language (V 3.0.2).

## DISCUSSION

1  
2 Clinical and environmental monitoring was reinforced during deconstruction work, according to  
3 standard French recommendations.<sup>32</sup> No specific prophylaxis strategy was implemented at our hospital for  
4 immunocompromised patients. Only patients with acute leukemia were susceptible to received prophylaxis  
5 therapy according to their condition. Outdoor and indoor environmental monitoring of contamination was  
6 implemented at EHH to prevent high-risk airborne fungal situations.  
7  
8  
9  
10  
11  
12

13  
14 The present study addresses several questions. Its main objective is to detect clinical cases as soon as  
15 possible to adequately manage invasive fungal infection risk in hospital during major deconstruction work  
16 and report new findings for future guidelines. Are national recommendations on protective measures in  
17 high-risk units efficient in shielding patients from *A. fumigatus* aerocontamination? Totally, 3,885 air  
18 samples were collected between February 23, 2015 and December 17, 2015. Air specimens, assessed by the  
19 cultivable method, were grouped into 2,141 indoor and 1,744 outdoor samples. A total of 296 days of  
20 recording were undertaken with the non-cultivable method. The high frequency and number of samples  
21 collected in this study during the 3 deconstruction periods will allow powerful statistical analysis to evaluate  
22 the efficiency of protective measures and reduce fungal contamination.  
23  
24  
25  
26  
27  
28  
29  
30  
31  
32  
33  
34

35 One of its objectives is to scrutinize the performance of non-cultivable methods of outdoor  
36 *Aspergillus* aerocontamination monitoring, such as Hirst-type spore traps, and to ascertain the impact of MP  
37 on *Aspergillus* aerocontamination. One preliminary study demonstrated potential interest in monitoring  
38 outdoor contamination.<sup>21</sup> Complete data on airborne fungal concentration will be analyzed by cultivable and  
39 non-cultivable sampling methods.<sup>33,34</sup> Non-cultivable methods allow the sampling of numerous spores,  
40 useful to carry out surveys but have limitation in fungal spore's identification only possible at the genus  
41 level.<sup>35</sup> Cultivable method can identify spores at the species level but is time-consuming and depends on the  
42 substrate plated and culture condition applied.<sup>36</sup> Cultivable methods generally allow the identification at the  
43 species level. Cultivable method is required to perform genotyping and evaluation of antifungal  
44  
45  
46  
47  
48  
49  
50  
51  
52  
53  
54  
55  
56  
57  
58  
59  
60

1  
2  
3  
4  
5  
6  
7  
8  
9  
10  
11  
12  
13  
14  
15  
16  
17  
18  
19  
20  
21  
22  
23  
24  
25  
26  
27  
28  
29  
30  
31  
32  
33  
34  
35  
36  
37  
38  
39  
40  
41  
42  
43  
44  
45  
46  
47  
48  
49  
50  
51  
52  
53  
54  
55  
56  
57  
58  
59  
60

susceptibility of the isolates. Cultivable and non-cultivable methods will be compared, which results could improve current prevention guidelines by providing early warning systems to hospitals.

Part of the study analysis evaluated the impact of MP on airborne fungal contamination. The relationship between meteorological parameters and fungal spore concentrations has already been scrutinized.<sup>37,38</sup> However, no study has investigated the role of meteorological factors in outdoor and indoor air contamination during construction works. A better understanding of MP impact on airborne fungi is needed to see if it could help to assess high-risk situations during construction work in hospital.

In addition, the present study compares the genetic diversity of clinical and environmental *A. fumigatus* isolates and profiles their antifungal susceptibility patterns. The aim is to describe *A. fumigatus* diversity over deconstruction periods along with genetic correlations between environmental and clinical strains collected. Correlation between environmental contamination and the occurrence of IA is hardly ever established due to limitations of both environmental sampling and genotyping.<sup>39,40</sup> Only a few authors have demonstrated links between clinical and environmental genotypes, and only a small number of environmental strains were included in the analysis, limiting the possibility of finding matches.<sup>41,42</sup>

The present work provides considerable data on potential IA outbreaks and determines genetic patterns among *A. fumigatus* isolates (Figure 3). Principally two methods of genotyping have emerged for study of medically important fungi: multilocus sequence typing (MLST) and method bases on short tandem repeats.<sup>43</sup> Comparison of several *A. fumigatus* typing techniques has suggested that methods based on short tandem repeats combine high discriminatory power, unambiguous interpretation and significant interlaboratory reproducibility.<sup>44-45</sup> MLVA based on 10 VNTR markers will be tested in this study: it has already permitted to evaluate *A. fumigatus* dispersion and diversity in the environment.<sup>29</sup> The MLVA-10 protocol normally employs singleplex PCRs and agarose gel electrophoresis (AE).<sup>29</sup> While traditional AE is relatively cheap, it is also time-consuming. In this study, a multiplex PCR system with multicolor CE for the MLVA-10 panel was designed and provided 97% typeability of isolates, good reproducibility and high



1 discriminatory power. The main advantage of this new MLVA is the high throughput that is facilitated by  
2 multiplex PCR and capillary electrophoresis.  
3  
4

5 The present study evaluates the antifungal susceptibility pattern of environmental and clinical  
6 isolates collected. The past decade has seen worldwide reports of azole drug resistance, with prevalence  
7 depending on country.<sup>11,46-48</sup> Recently, Choukri *et al.*<sup>12</sup> observed that the overall prevalence of azole  
8 resistance in France was about 1.8% in unselected clinical *A. fumigatus* isolates. Resistance has also been  
9 encountered in the environment, but possible linkage between clinical resistance and environmental usage of  
10 azole fungicides is still unclear.<sup>49,50</sup> Environmental acquisition and dispersion of resistance have been  
11 reinforced by IA attributed to azole-resistant *A. fumigatus* isolates in patients who have never ever been  
12 subjected to azole therapy.<sup>51</sup> Determination of the prevalence of azole resistance may contribute to better  
13 management of IA cases.  
14  
15  
16  
17  
18  
19  
20  
21  
22  
23  
24  
25

26 Azole resistance and genetic patterns can provide experimental data to evaluate correlations between  
27 clinical and environmental isolates and clearly understand *A. fumigatus* dispersion during large demolition  
28 programs.  
29  
30  
31  
32

33 This work had some limitations. Adjustment of MP could change the data analysis and conclusions. As IA  
34 incubation time is unknown or variable, ranging from a few days to 3 months, its diagnosis may involve  
35 some bias.<sup>52-56</sup> Precise definition by EORTC/MSG was respected to identify IA cases and reduce  
36 misclassification.<sup>25</sup> This protocol could not be implemented during a baseline period before construction  
37 work began. Microbiological identification will focus only on *Aspergillus spp.* because it is the leading  
38 pathogen responsible for IA.<sup>3</sup> To improve study outcomes, data on airborne fungal colonization in hospital  
39 need to be analyzed in association with indoor air-handling systems. Although 2 air sampling collectors  
40 were used in the study, no particle counter was tested. Klassen *et al.* have underlined the existence of  
41 possible genetic differentiation and variable recombination rates of *A. fumigatus* which could prevent correct  
42 analysis of genotyping result.<sup>57</sup>  
43  
44  
45  
46  
47  
48  
49  
50  
51  
52  
53  
54  
55  
56  
57  
58  
59  
60

1  
2  
3  
4  
5  
6  
7  
8  
9  
10  
11  
12  
13  
14  
15  
16  
17  
18  
19  
20  
21  
22  
23  
24  
25  
26  
27  
28  
29  
30  
31  
32  
33  
34  
35  
36  
37  
38  
39  
40  
41  
42  
43  
44  
45  
46  
47  
48  
49  
50  
51  
52  
53  
54  
55  
56  
57  
58  
59  
60

A combined approach could deliver meaningful conclusions on *Aspergillus spp.* dispersion and hopefully give new insights into improvement of environmental monitoring and of hospital guidelines during major demolition work. This study fits in with larger, ongoing exposome research based on increased knowledge of connections between environmental exposure and health.<sup>58</sup>

For peer review only

## DECLARATIONS

**Contributors:** STL, EM, CD, LH, and TB acquired the original data for this study. STL, EM, CD, TB, JG, FB, MPG, and PV formulated study methodology. STL, EM, MPG and PV designed the protocol. CD, TB, PC, DD and MW helped with manuscript writing and language review. All authors contributed to revisions and approved the final manuscript version.

**Funding:** This study was supported by Laboratoires ANIOS and the Department of Environment & Public Health, Faculty of Medicine, Université de Lyon, France and Edouard Herriot Hospital, Lyon, France. The funder provided support in the form of salaries for authors Loeffert ST, but did not have any additional role in the study design, data collection and analysis, decision to publish or preparation of the manuscript.

### Competing interests

None declared. All authors approved the final version of the manuscript and vouch that it is not being considered for publication elsewhere. PhD salary support of the first author by Laboratoires ANIOS is acknowledged. The other authors of this article have no conflict of interest to declare.

**Acknowledgements:** The authors thank all hospital department chiefs for study participation. They also thank the EA 7380 Dynamyc Team from Université Paris Est, France, the Mycology and Parasitology Institute of Lyon and Analyzair<sup>®</sup> Society, Lyon, France, for providing invaluable advice.

## REFERENCES

- 1  
2  
3 [1] Denning DW. Invasive aspergillosis. *Clin Infect Dis* 1998;26:781-805.  
4  
5  
6 [2] Marr KA, Patterson T, Denning D. Aspergillosis. Pathogenesis, clinical manifestations and therapy.  
7  
8 *Infect Dis Clin North Am* 2002;16:875-94.  
9  
10  
11 [3] Garcia-Vidal C, Upton A, Kirby KA, *et al.* Epidemiology of invasive mold infections in allogeneic stem  
12  
13 cell transplant recipients: biological risk factors for infection according to time after transplantation. *Clin*  
14  
15 *Infect Dis* 2008;47:1041-50.  
16  
17  
18 [4] Nicolle MC, Bénet T, Thiebaut A, *et al.* Invasive aspergillosis in patients with hematologic  
19  
20 malignancies: incidence and description of 127 cases enrolled in a single institution prospective survey from  
21  
22 2004 to 2009. *Haematologica* 2011;96:1685-91.  
23  
24  
25  
26 [5] Hadrich I, Makni F, Sellami H, *et al.* Invasive aspergillosis: epidemiology and environmental study in  
27  
28 haematology patients (Sfax, Tunisia). *Mycoses* 2010;53:443-7.  
29  
30  
31 [6] López-Medrano F, Silva JT, Fernández-Ruiz M, *et al.* Risk factors associated with early invasive  
32  
33 pulmonary aspergillosis in kidney transplant recipients. Results from a multinational matched case-control  
34  
35 study. *Am J Transplant* 2016;16(7):2148-57.  
36  
37  
38 [7] Lortholary O, Gangneux JP, Sitbon K, *et al.* Epidemiological trends in invasive aspergillosis in France:  
39  
40 the SAIF network (2005-2007). *Clin Microbiol Infect* 2011;17:1882-9.  
41  
42  
43 [8] Führen J, Voskuil WS, Boel CH, *et al.* High prevalence of azole resistance in *Aspergillus fumigatus*  
44  
45 isolates from high-risk patients. *J Antimicrob Chemother* 2015;70:2894-8.  
46  
47  
48 [9] Chowdhary A, Kathuria S, Xu J, *et al.* Emergence of azole-resistant *Aspergillus fumigatus* strains due to  
49  
50 agricultural azole use creates an increasing threat to human health. *PLoS Pathog* 2013;9(10):e1003633.  
51  
52  
53 [10] Vermeulen E, Lagrou K, Verweij PE. Azole resistance in *Aspergillus fumigatus*: a growing public  
54  
55 health concern. *Curr Opin Infect Dis* 2013;26:493-500.  
56  
57  
58  
59  
60

- 1  
2  
3  
4  
5  
6  
7  
8  
9  
10  
11  
12  
13  
14  
15  
16  
17  
18  
19  
20  
21  
22  
23  
24  
25  
26  
27  
28  
29  
30  
31  
32  
33  
34  
35  
36  
37  
38  
39  
40  
41  
42  
43  
44  
45  
46  
47  
48  
49  
50  
51  
52  
53  
54  
55  
56  
57  
58  
59  
60
- [11] Lavergne RA, Morio F, Favennec L, *et al.* First description of azole-resistant *Aspergillus fumigatus* due to TR46/Y121F/T289A mutation in France. *Antimicrob Agents Chemother* 2015;59(7):4331-5.
- [12] Choukri F, Botterel F, Sitterlé E, *et al.* Prospective evaluation of azole resistance in *Aspergillus fumigatus* clinical isolates in France. *Med Mycol* 2015;53:593-6.
- [13] O’Gorman CM. Airborne *Aspergillus fumigatus* conidia: a risk factor for aspergillosis. *Fung Biol Rev* 2011;25:151-7.
- [14] Gangneux JP, Adjidé CC, Bernard L, *et al.* Quantitative assessment of fungal risk in the case of construction works in healthcare establishments: proposed indicators for the determination of the impact of management precautions on the risk of fungal infection. *J Mycol Med* 2012;22:64-71.
- [15] Kanamori H, Rutala WA, Sickbert-Bennett EE, *et al.* Review of fungal outbreaks and infection prevention in healthcare settings during construction and renovation. *Clin Infect Dis* 2015;61:433-4.
- [16] Perraud P, Piens MA, Nicoloyannis N, *et al.* Invasive nosocomial pulmonary aspergillosis: risk factors and hospital building works. *Epidemiol Infect* 1987;99:407-12.
- [17] Bénet T, Nicolle MC, Thiebaut A, *et al.* Reduction of invasive aspergillosis incidence among immunocompromised patients after control of environmental exposure. *Clin Infect Dis* 2007;15;45(6):682-6.
- [18] Méheust D, Le Cann P, Reboux G, *et al.* Indoor fungal contamination: health risks and measurement methods in hospitals, homes and workplaces. *Crit Rev Microbiol* 2014;40:248-60.
- [19] Reboux G, Gbaguidi-Haore H, Bellanger AP, *et al.* A 10-year survey of fungal aerocontamination in hospital corridors: a reliable sentinel to predict fungal exposure risk? *J Hosp Infect* 2014;87:34-40.
- [20] Fournel I, Sautour M, Lafon I, *et al.* Airborne *Aspergillus* contamination during hospital construction works: efficacy of protective measures. *Am J Infect Control* 2010;38(3):189-94.
- [21] Dananché C, Gustin MP, Cassier P, *et al.* Evaluation of hirst-type spore trap to monitor environmental fungal load in hospital. *Plos One* 2017;12(5):e0177263.

- 1  
2  
3  
4  
5  
6  
7  
8  
9  
10  
11  
12  
13  
14  
15  
16  
17  
18  
19  
20  
21  
22  
23  
24  
25  
26  
27  
28  
29  
30  
31  
32  
33  
34  
35  
36  
37  
38  
39  
40  
41  
42  
43  
44  
45  
46  
47  
48  
49  
50  
51  
52  
53  
54  
55  
56  
57  
58  
59  
60
- [22] Gangneux JP, Bousseau A, Cornillet A, Kauffmann-Lacroix C. Control of fungal environmental risk in French Hospitals. *Journal de Mycologie Médicale* 2006;16:204–211.
- [23] Méheust D, Gangneux JP, Cann PL. Comparative evaluation of three impactor samplers for measuring airborne bacteria and fungi concentrations. *J Occup Environ Hyg* 2013;10(8):455-9.
- [24] Boff C, Brun CP, Miron D, *et al.* Technical note: The effect of different incubation temperatures on the recovery of *Aspergillus* species from hospital air. *Am J Infect Control* 2012;40:1016-7.
- [25] Pauw BD, Walsha TJ, Donnelly JP, *et al.* Revised Definitions of Invasive Fungal Disease from the European Organization for Research and Treatment of Cancer/Invasive Fungal Infections Cooperative Group and the National Institute of Allergy and Infectious Diseases Mycoses Study Group (EORTC/MSG) Consensus Group. *Clin Infect Dis* 2008;46(12):1813-21.
- [26] Hope WW, Walsh TJ, Denning DW. Laboratory diagnosis of invasive aspergillosis. *Lancet Infect Dis* 2005;5(10):609-22.
- [27] Nicolle MC, Bénet T, Vanhems P. Nosocomial or community-acquired? *Med Mycol* 2011;49:24-9.
- [28] Bénet T, Voirin N, Nicolle MC, *et al.* Estimation of the incubation period of invasive aspergillosis by survival models in acute myeloid leukemia patients. *Med Mycol* 2013;51:214-8.
- [29] Thierry S, Wang D, Arné P, *et al.* Multiple-locus variable-number tandem repeat analysis for molecular typing of *Aspergillus fumigatus*. *BMC Microbiol* 2010;10:315.
- [30] Francisco AP, Vaz C, Monteiro PT, *et al.* PHYLOViZ: phylogenetic inference and data visualization for sequence based typing methods. *BMC Bioinformatics* 2012;13:87.
- [31] Espinel-Ingroff A, Arendrup M, Cantón E, *et al.* Multicenter Study of Method-Dependent Epidemiological Cutoff Values for Detection of Resistance in *Candida* spp. and *Aspergillus* spp. to Amphotericin B and Echinocandins for the Etest Agar Diffusion Method. *Antimicrob Agents Chemother* 2016;61(1). pii: e01792-16.
- [32] Risque infectieux fongique et travaux en établissements de santé. Identification du risque et mise en place de mesures de gestion. *Hygiène* 2009;19(1):1-53.

- 1  
2  
3  
4  
5  
6  
7  
8  
9  
10  
11  
12  
13  
14  
15  
16  
17  
18  
19  
20  
21  
22  
23  
24  
25  
26  
27  
28  
29  
30  
31  
32  
33  
34  
35  
36  
37  
38  
39  
40  
41  
42  
43  
44  
45  
46  
47  
48  
49  
50  
51  
52  
53  
54  
55  
56  
57  
58  
59  
60
- [33] Fernández-Rodríguez S, Tormo-Molina R, Maya-Manzano JM, *et al.* Outdoor airborne fungi captured by viable and non-viable methods. *Fungal Ecology* 2014;7:16-26.
- [34] Grinn-Gofron A. Airborne *Aspergillus* and *Penicillium* in the atmosphere of Szczecin (Poland) (2004-2009). *Aerobiologia* 2011;27:67-76.
- [35] Fernández-Rodríguez S, Tormo-Molina R, Maya-Manzano JM, Silva-Palacios I, Gonzalo-Garijo A. Outdoor airborne fungi captured by viable and nonviable methods. *Fungal Ecology* 2014;7:16-26.
- [36] Fernández-Rodríguez S, Molina RT, Palacios IS, Garijo AG. Two sampling methods for the Petri dish detection of airborne fungi. *Grana* 2011;50:202-7.
- [37] Cavallo M, Andreoni S, Martinotti MG, Rinaldi M, Fracchia L. Monitoring environmental *Aspergillus* spp. contamination and meteorological factors in a haematological unit. *Mycopathologia* 2013;176:387-94.
- [38] Mahieu LM, De Dooy JJ, Van Laer FA, Jansens H, Ieven MM. A prospective study on factors influencing aspergillus spore load in the air during renovation works in a neonatal intensive care unit. *J Hosp Infect* 2000;45(3):191-7.
- [39] Bart-Delabesse E, Cordonnier C, Bretagne S. Usefulness of genotyping with microsatellite markers to investigate hospital-acquired invasive aspergillosis. *J Hosp Infect* 1999;42(4):321-7.
- [40] Menotti J, Waller J, Meunier O, Letscher-Bru V, Herbrecht R, Candolfi E. Epidemiological study of invasive pulmonary aspergillosis in a haematology unit by molecular typing of environmental and patient isolates of *Aspergillus fumigatus*. *J Hosp Infect* 2005;60(1):61-8.
- [41] Guinea J, García de Viedma D, Peláez T, *et al.* Molecular epidemiology of *Aspergillus fumigatus*: an in-depth genotypic analysis of isolates involved in an outbreak of invasive aspergillosis. *J Clin Microbiol* 2011;49(10):3498-503.
- [42] Peláez T, Muñoz P, Guinea J, *et al.* Outbreak of invasive Aspergillosis after major heart surgery caused by spores in the air of the intensive care unit. *Clin Infect Dis* 2012;54(3):e24-31.
- [43] Alanio A, Bretagne S. Challenges in microbiological diagnosis of invasive *Aspergillus* infections. *Faculty Rev* 2017;(1):157.

- 1  
2  
3  
4  
5  
6  
7  
8  
9  
10  
11  
12  
13  
14  
15  
16  
17  
18  
19  
20  
21  
22  
23  
24  
25  
26  
27  
28  
29  
30  
31  
32  
33  
34  
35  
36  
37  
38  
39  
40  
41  
42  
43  
44  
45  
46  
47  
48  
49  
50  
51  
52  
53  
54  
55  
56  
57  
58  
59  
60
- [44] de Valk HA, Meis JF, Klaassen CH. Microsatellite based typing of *Aspergillus fumigatus*: strengths, pitfalls and solutions. *J Microbiol Methods* 2007;69:268-72.
- [45] de Valk HA, Meis JF, Bretagne S, *et al.* Interlaboratory reproducibility of a microsatellite-based typing assay for *Aspergillus fumigatus* through the use of allelic ladders: proof of concept. *Clin Microbiol Infect* 2009;15:180-7.
- [46] van der Linden JW, Snelders E, Kampinga GA, *et al.* Clinical implications of Azole resistance in *Aspergillus fumigatus*, The Netherlands, 2007-2009. *Emerg Infect Dis* 2011;17:1846-54.
- [47] Lelièvre L, Groh M, Angebault C, *et al.* Azole resistant *Aspergillus fumigatus*: an emerging problem. *Med Mal Infect* 2013;43(4):139-45.
- [48] Vermeulen E, Maertens J, Schoemans H, Lagrou K. Azole-resistant *Aspergillus fumigatus* due to TR46/Y121F/T289A mutation emerging in Belgium, July 2012. *Euro Surveill* 2012;17(48). pii: 20326.
- [49] Snelders E, Huis In 't Veld RA, Rijs AJ, *et al.* Possible environmental origin of resistance of *Aspergillus fumigatus* to medical triazoles. *Appl Environ Microbiol* 2009;75(12):4053-7.
- [50] Kano R, Sobukawa H, Murayama YS, *et al.* *In vitro* resistance of *Aspergillus fumigatus* to azole farm fungicide. *J Infect Chemother* 2016;22:133-6.
- [51] van der Linden JW, Camps SM, Kampinga GA, *et al.* Aspergillosis due to voriconazole highly resistant *Aspergillus fumigatus* and recovery of genetically related resistant isolates from domiciles. *Clin Infect Dis* 2013;57:513-20.
- [52] Balloy V, Huerre M, Latgé JP, *et al.* Differences in patterns of infection and inflammation for corticosteroid treatment and chemotherapy in experimental invasive pulmonary aspergillosis. *Infect Immun* 2005;73(1):494-503.
- [53] Gregg KS, Kauffman CA. Invasive Aspergillosis: Epidemiology, Clinical Aspects, and Treatment. *Semin Respir Crit Care Med* 2015;36(5):662-72.
- [54] Kosmidis C, Denning DW. The clinical spectrum of pulmonary aspergillosis. *Thorax* 2015;70:270-7.



1 [55] Meersseman W, Vandecasteele SJ, Wilmer A, *et al.* Invasive aspergillosis in critically ill patients  
2 without malignancy. *Am J Respir Crit Care Med* 2004;170:621-5.  
3

4 [56] American Academy of Pediatrics. Committee on Infectious Diseases. Red Book, 28<sup>th</sup> edition. Elk  
5 Grove Village, IL: American Academy of Pediatrics, 2009.  
6  
7

8 [57] Klaassen CHW, Gibbons JG, Fedorova ND, Meis JF, Rokas A. Evidence for genetic differentiation and  
9 variable recombination rates among Dutch populations of the opportunistic human pathogen *Aspergillus*  
10 *fumigatus*. *Mol Ecol. Blackwell Publishing Ltd*; 2012;21(1):57–70.  
11  
12  
13

14 [58] Escher BI, Hackermüller J, Polte T, *et al.* From the exposome to mechanistic understanding of  
15 chemical-induced adverse effects. *Environ Int* 2017;99:97-106.  
16  
17  
18  
19  
20  
21  
22  
23  
24  
25  
26  
27  
28  
29  
30  
31  
32  
33  
34  
35  
36  
37  
38  
39  
40  
41  
42  
43  
44  
45  
46  
47  
48  
49  
50  
51  
52  
53  
54  
55  
56  
57  
58  
59  
60

**FIGURE LEGENDS**

**Figure 1:** *Location of Edouard Herriot Hospital, Lyon (France)*

**Figure 2:** *Detailed map of Edouard Herriot Hospital and environmental monitoring sampling sites*

**Figure 3:** *Flow chart of protocol study*

For peer review only

1  
2  
3  
4  
5  
6  
7  
8  
9  
10  
11  
12  
13  
14  
15  
16  
17  
18  
19  
20  
21  
22  
23  
24  
25  
26  
27  
28  
29  
30  
31  
32  
33  
34  
35  
36  
37  
38  
39  
40  
41  
42  
43  
44  
45  
46  
47  
48  
49  
50  
51  
52  
53  
54  
55  
56  
57  
58  
59  
60

Figure 1: Location of Edouard Herriot Hospital, Lyon (France)

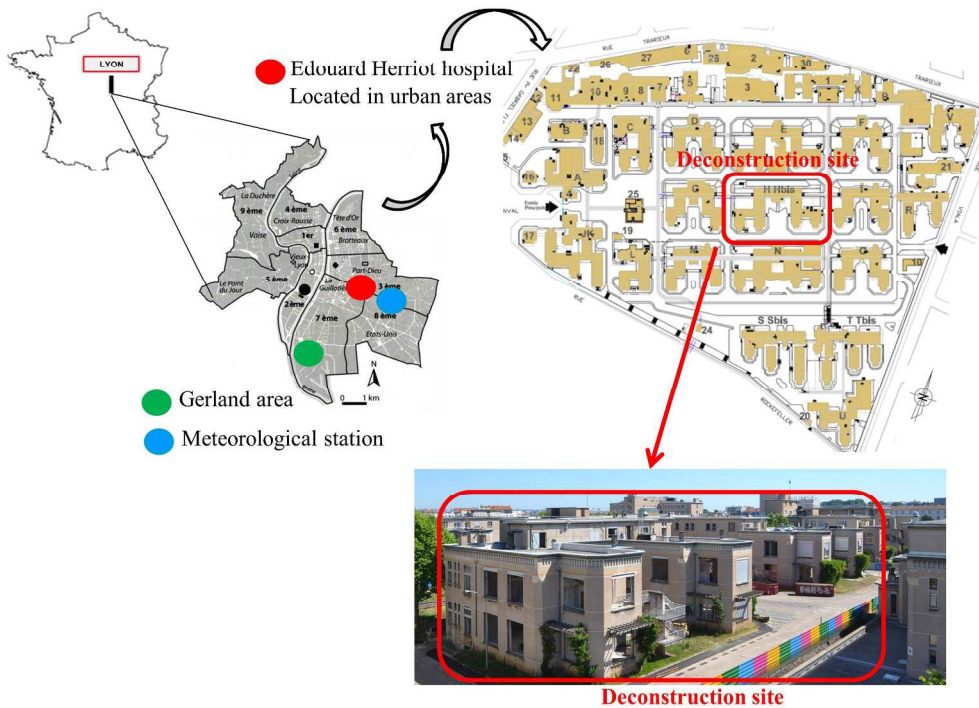

Location of Edouard Herriot Hospital, Lyon (France)

254x190mm (300 x 300 DPI)

ew only

Figure 2: Detailed map of Edouard Herriot Hospital and sampling sites of environmental monitoring

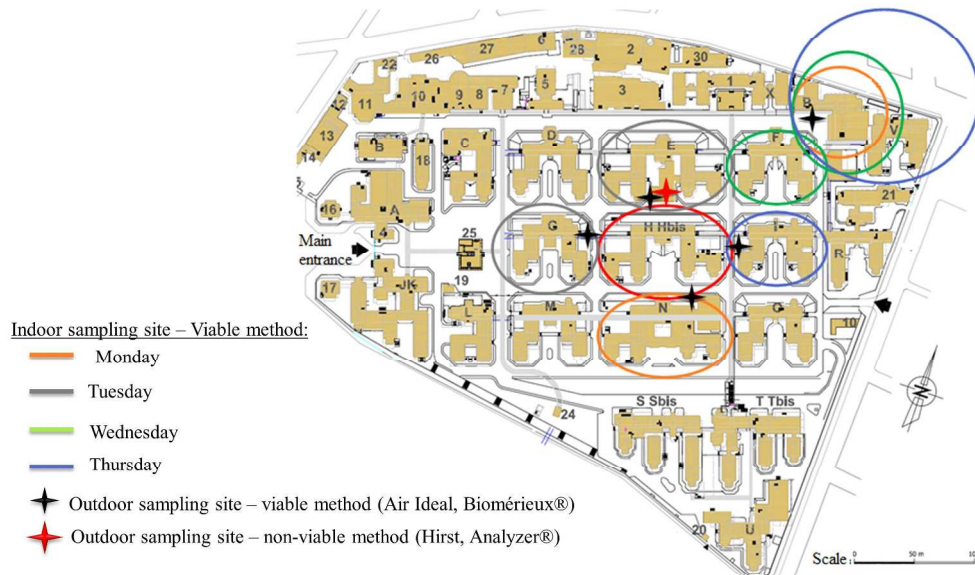

Detailed map of Edouard Herriot hospital and sampling sites of environmental monitoring

254x190mm (300 x 300 DPI)

ew only

1  
2  
3  
4  
5  
6  
7  
8  
9  
10  
11  
12  
13  
14  
15  
16  
17  
18  
19  
20  
21  
22  
23  
24  
25  
26  
27  
28  
29  
30  
31  
32  
33  
34  
35  
36  
37  
38  
39  
40  
41  
42  
43  
44  
45  
46  
47  
48  
49  
50  
51  
52  
53  
54  
55  
56  
57  
58  
59  
60

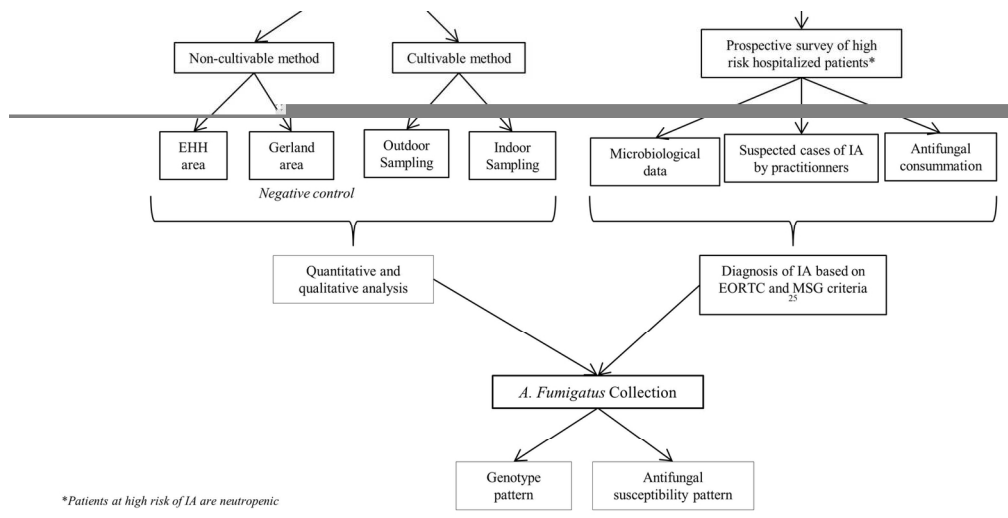

Flow chart of protocol study

149x111mm (300 x 300 DPI)

ew only
